# Supplementary material
Source: PubMed Central journal article supplement (PMC4380236)
Supplement: NIHMS666251-supplement-1.pdf [file NIHMS666251-supplement-1.pdf]

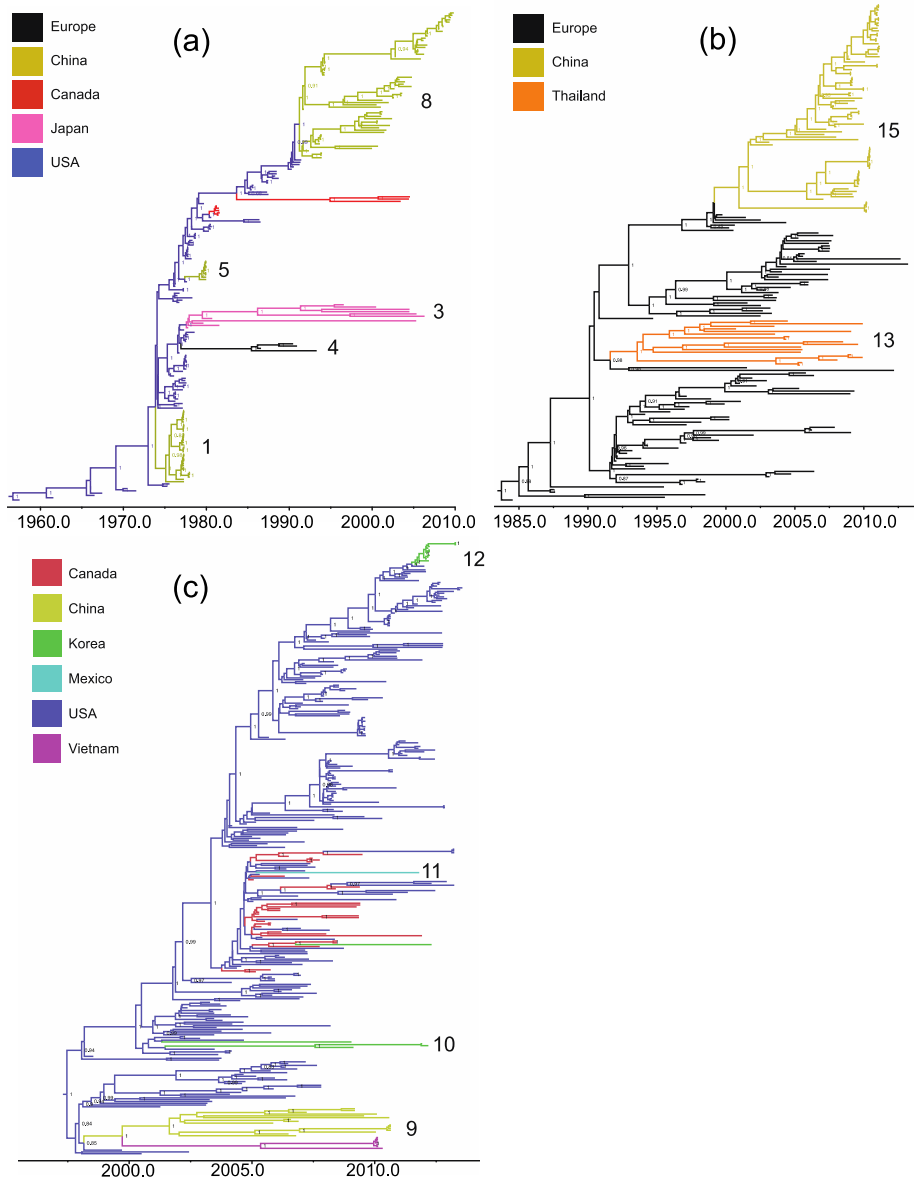

**Supplementary Fig. 1. MCC trees of the PB2 lineages in swine.** Time-scaled Bayesian MCC trees inferred for the PB2 segment for the three major swine virus lineages: (a) classical swIAV lineage, (b) avian-origin Eurasian swIAV lineage, and (c) triple reassortant (trig) swIAV lineage. Shading and labeling is identical to Fig. 3.

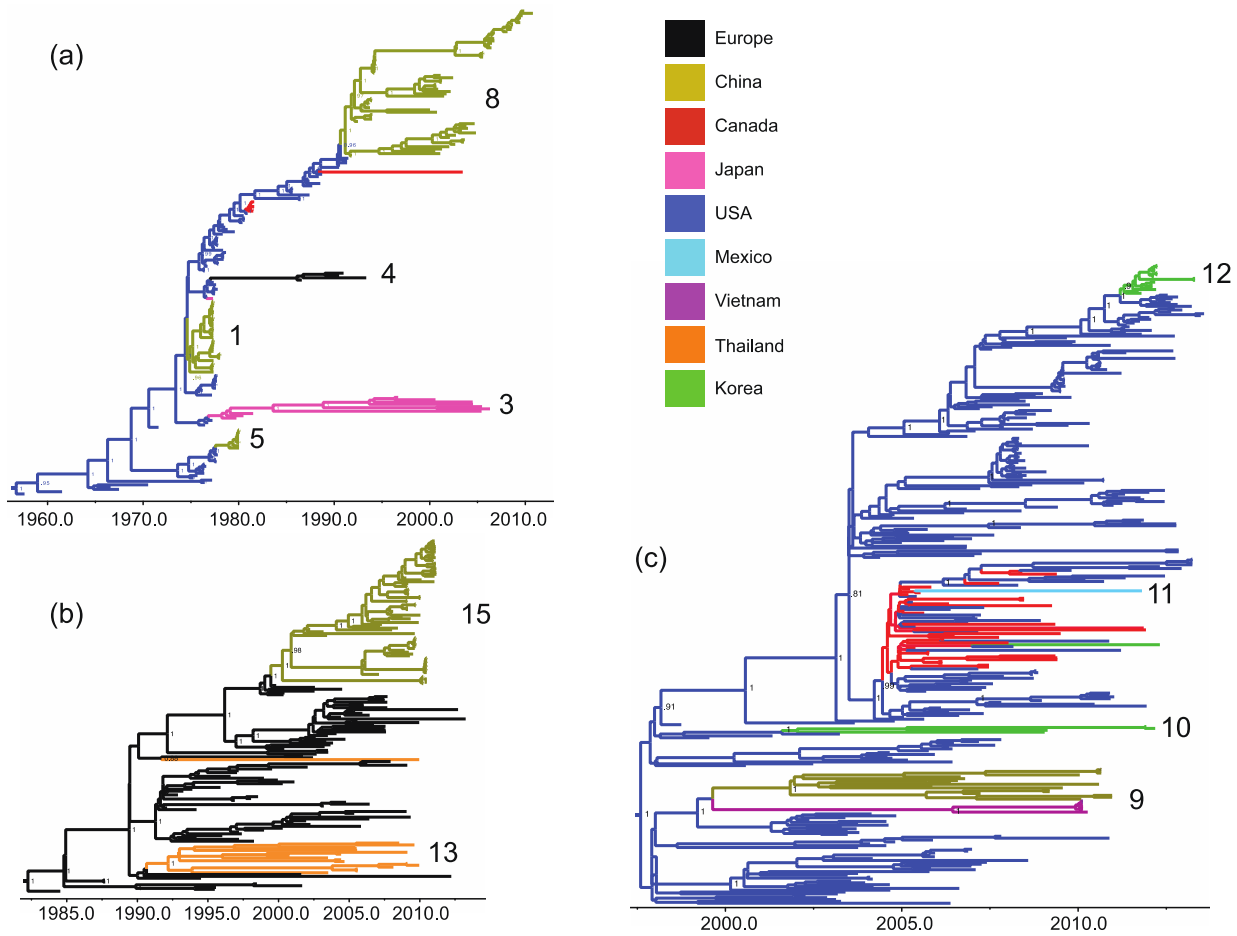

**Supplementary Fig. 2. MCC trees of the PB1 lineages in swine.** Time-scaled Bayesian MCC trees inferred for the PB1 segment for the three major swine virus lineages: (a) classical swIAV lineage, (b) avian-origin Eurasian swIAV lineage, and (c) triple reassortant (trig) swIAV lineage. Shading and labeling is identical to Fig. 3.

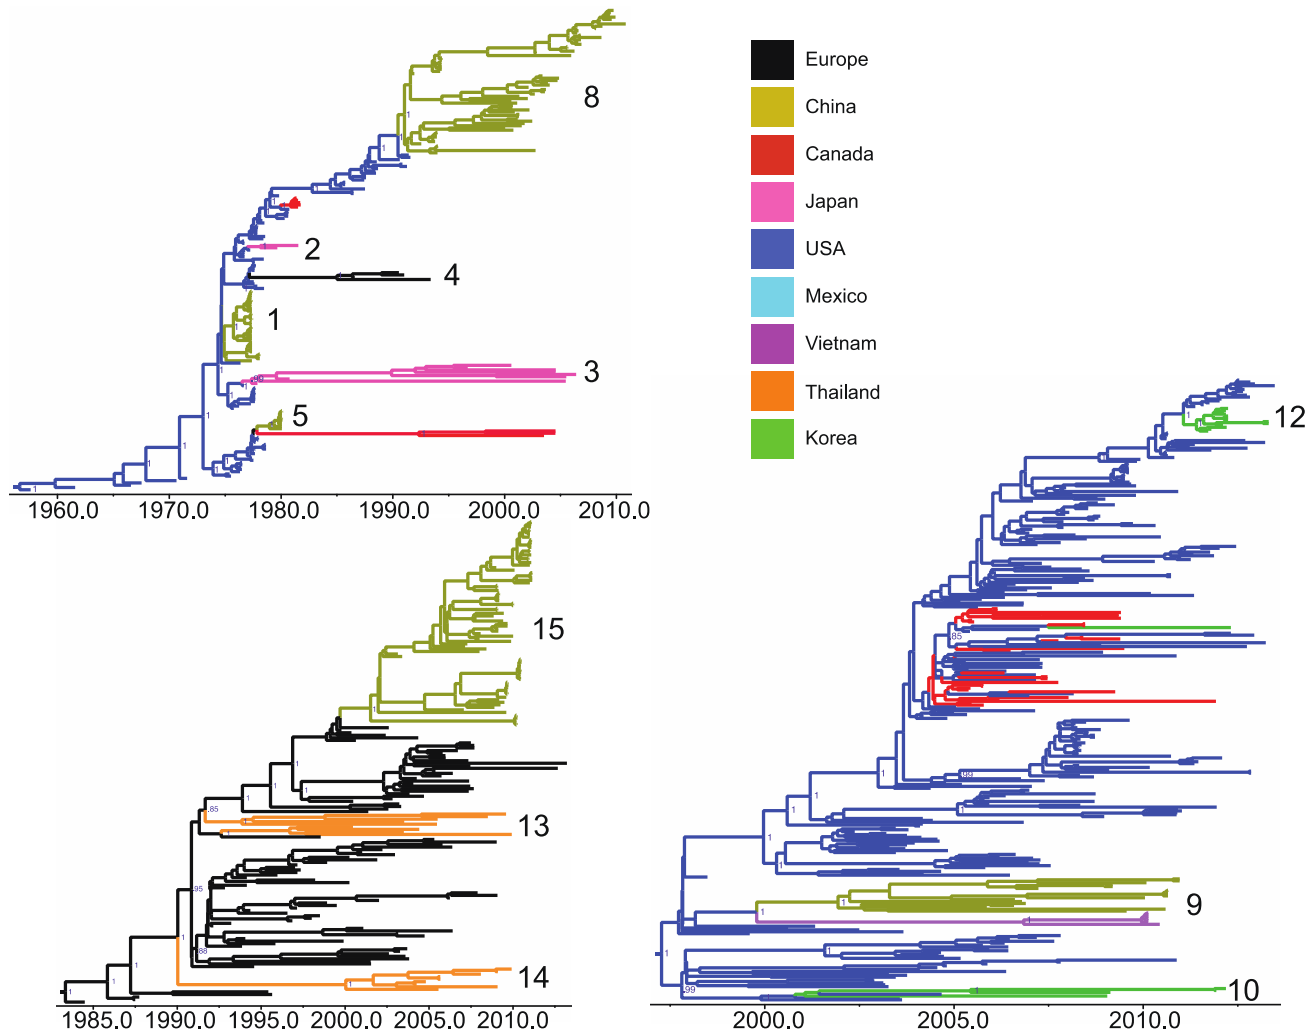

**Supplementary Fig. 3. MCC trees of the PA lineages in swine.** Time-scaled Bayesian MCC trees inferred for the PA segment for the three major swine virus lineages: (a) classical swIAV lineage, (b) avian-origin Eurasian swIAV lineage, and (c) triple reassortant (trig) swIAV lineage. Shading and labeling is identical to Fig. 3.

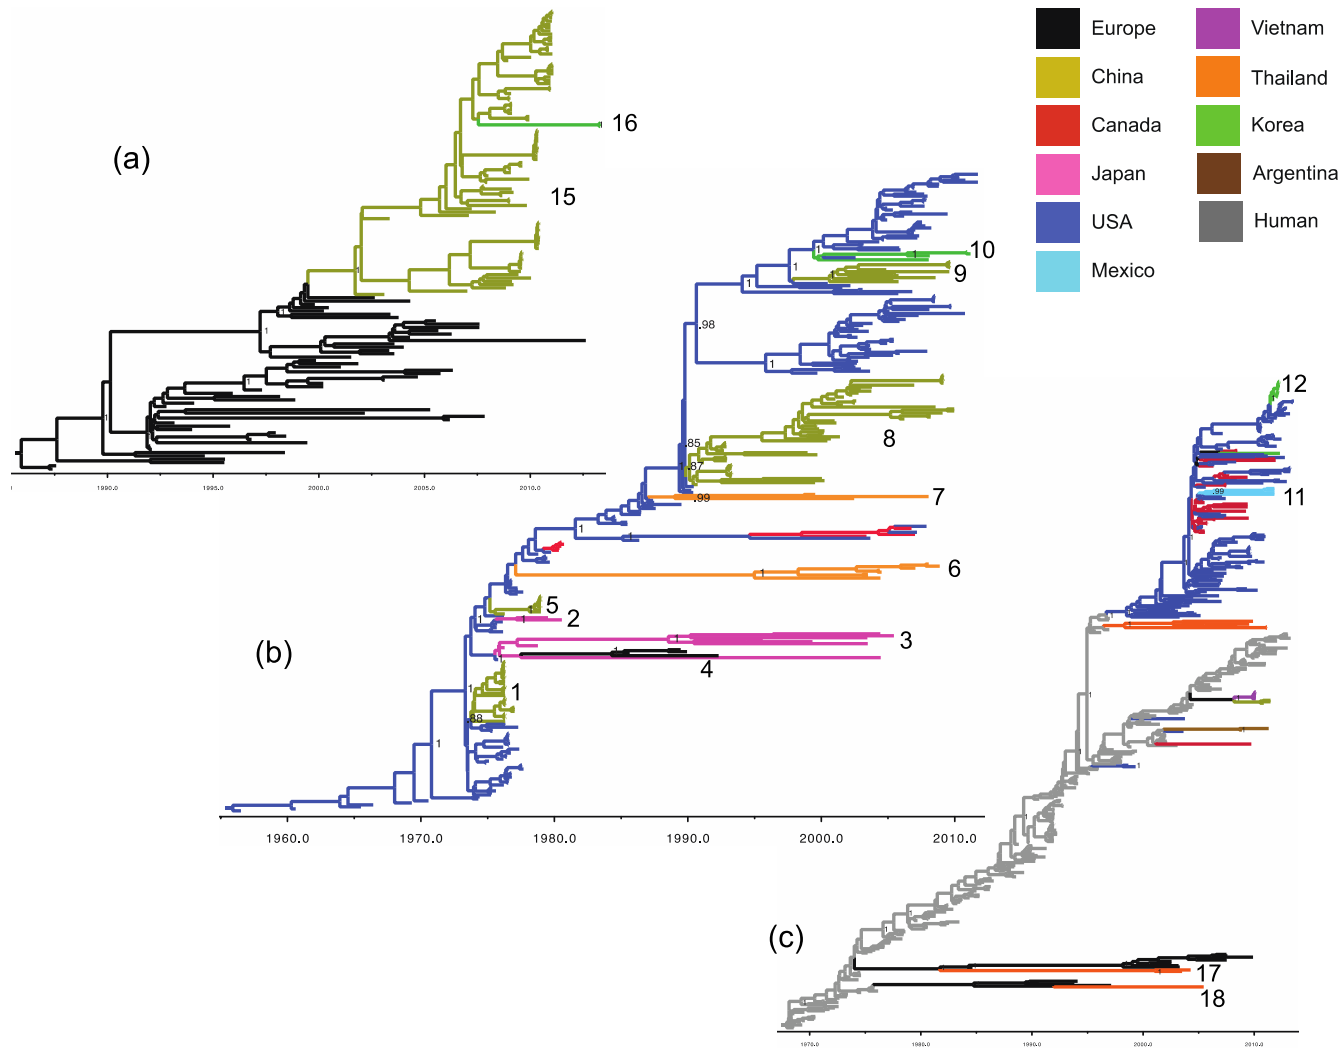

**Supplementary Fig. 4. MCC trees of the HA lineages in swine.** Time-scaled Bayesian MCC trees inferred for the HA segment for the three major swine virus lineages: (a) avian-origin Eurasian H1 swIAV lineage, (b) classical H1 swIAV lineage, and (c) multiple human seasonal virus-origin H3 swIAV lineages circulating in swine. Shading and labeling is identical to Fig. 3.

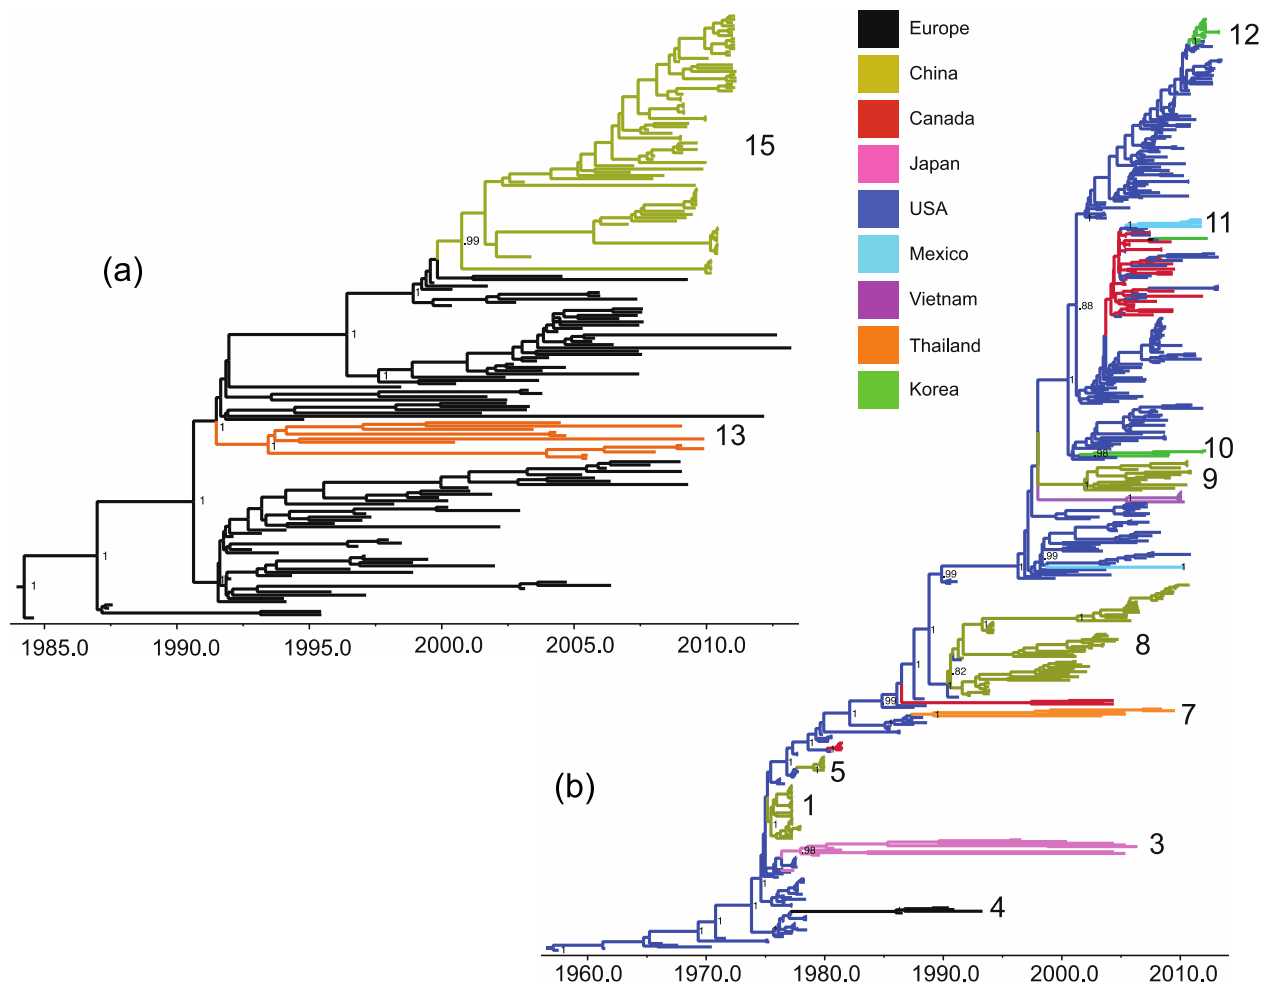

**Supplementary Fig. 5. MCC trees of the NP lineages in swine.** Time-scaled Bayesian MCC trees inferred for the NP segment for the two major swine virus lineages: (a) avian-origin Eurasian swIAV lineage, and (b) classical swIAV lineage. Shading and labeling is identical to Fig. 3.

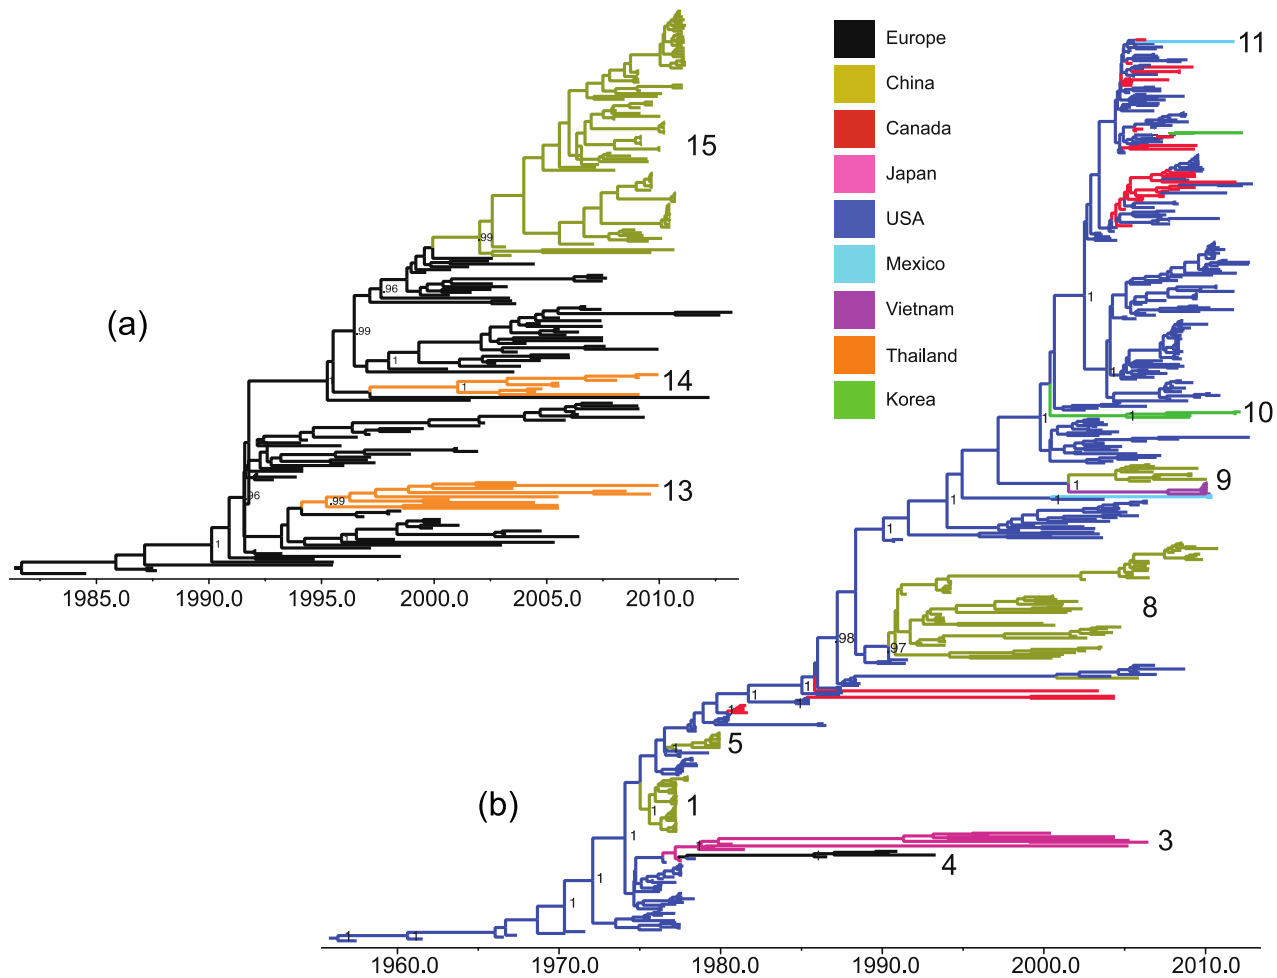

**Supplementary Fig. 6. MCC trees of the MP lineages in swine.** Time-scaled Bayesian MCC trees inferred for the MP segment for the two major swine virus lineages: (a) avian-origin Eurasian swIAV lineage, and (b) classical swIAV lineage. Shading and labeling is identical to Fig. 3.

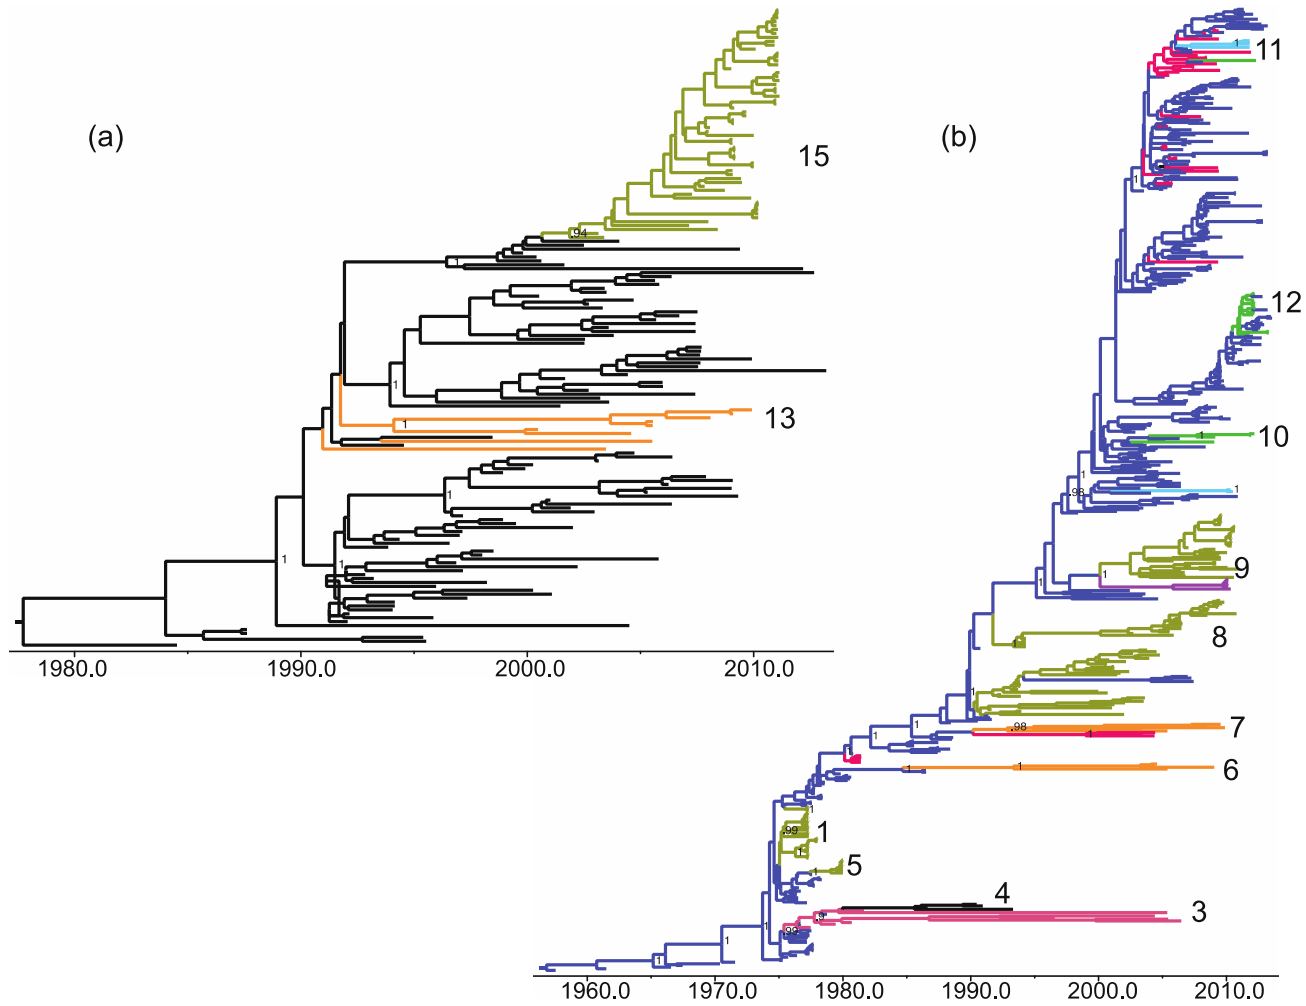

**Supplementary Fig. 7. MCC trees of the NS lineages in swine.** Time-scaled Bayesian MCC trees inferred for the NS segment for the two major swine virus lineages: (a) avian-origin Eurasian swIAV lineage, and (b) classical swIAV lineage. Shading and labeling is identical to Fig. 3.

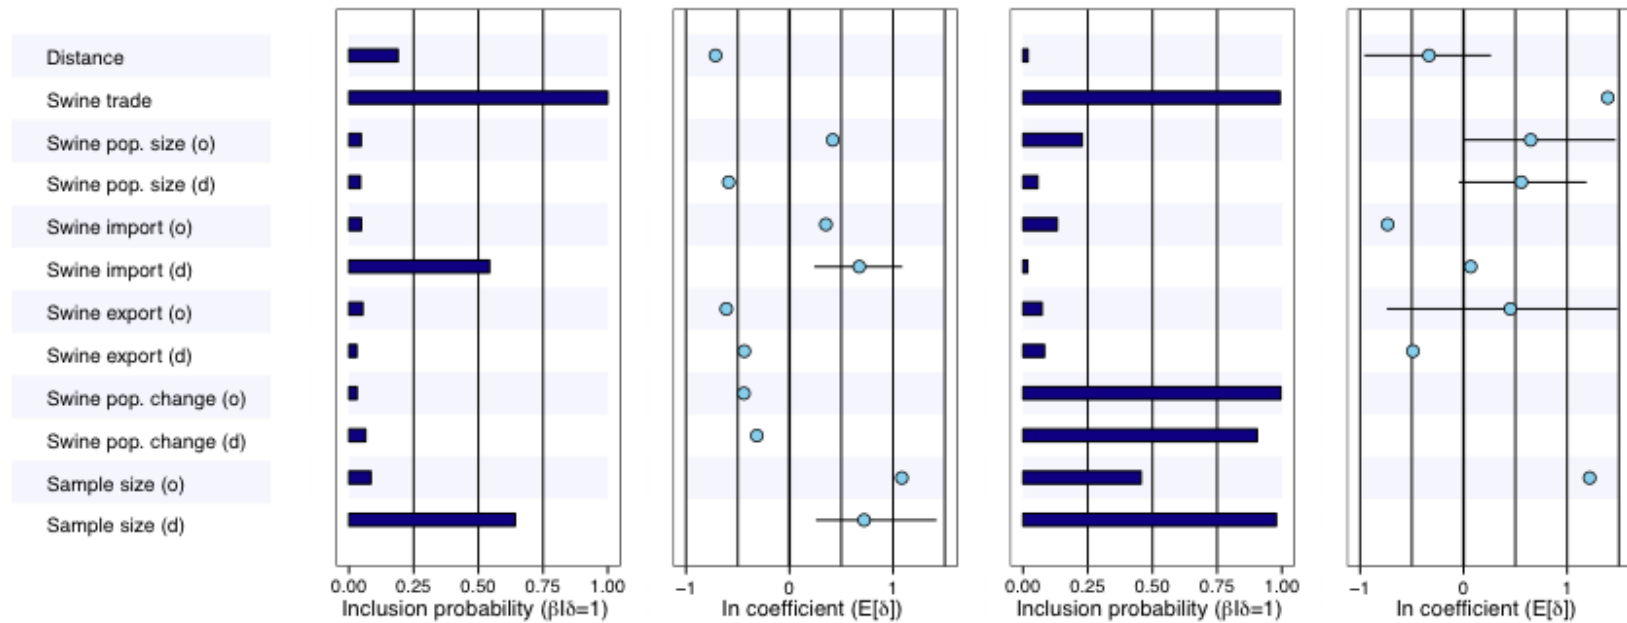

**Supplementary Fig. 8. The support and contribution of predictors of swIAV diffusion among 9 countries for the MP and NS segments.** Twelve predictors were considered: geographical distance (km), volume of live swine trade, 1996-2012 (USD), swine population size for the years 1969-2010, the total number of imports of live swine during 1969-2010, the total number of swine exports during 1969-2010, the percent change in swine population size from 1969-2010, and the number of sequences available from a given country for our analysis. (O) refers to the swine population of origin, and (d) refers to the swine population of destination. Support for each predictor is represented by an inclusion probability that is estimated as the posterior expectation for the indicator variable associated with each predictor ( $E[\delta]$ ). The contribution of each predictor is represented by the mean and credible intervals of the GLM coefficients ( $\beta$ ) on a log scale conditional on the predictor being included in the model ( $\beta|\delta=1$ ).



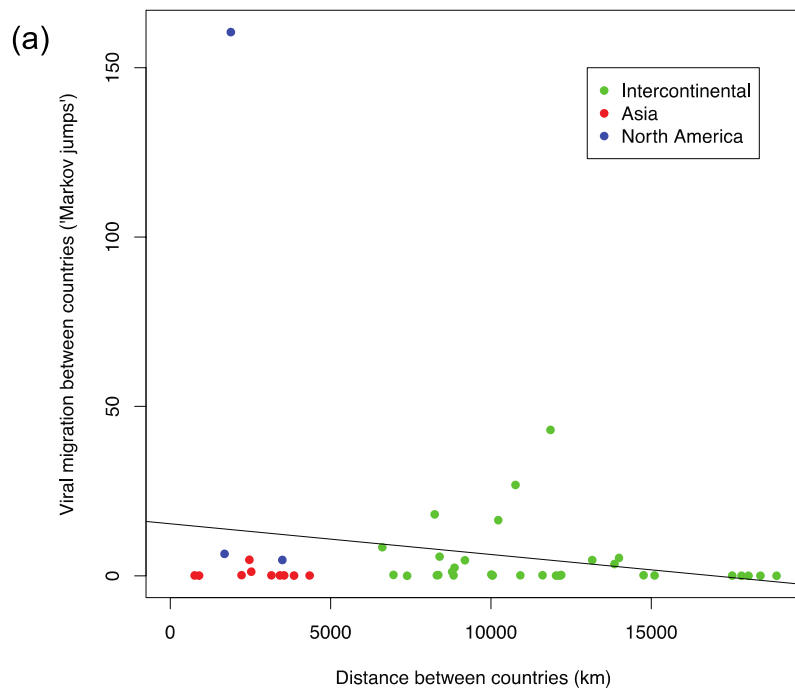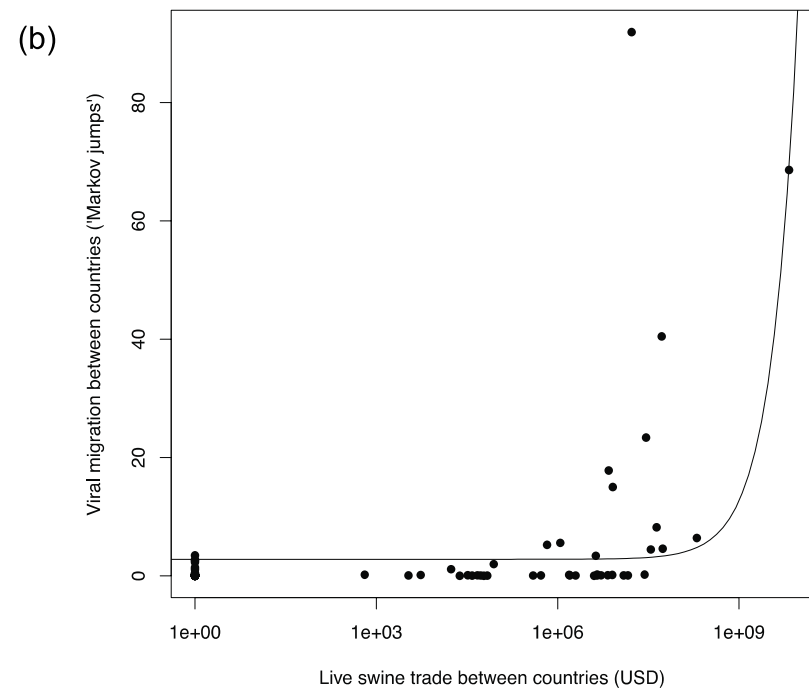

**Supplementary Fig. 9. Plots of viral migration, distance, and live swine trade.** (a) Viral migration between pairwise countries (represented by the number of 'Markov jump' counts, symmetrical) is plotted against geographical distance (km) between countries, which are shaded by region (connections between countries in North America are blue, connections between Asian countries are red, and intercontinental links are green). (b) Viral migration (asymmetrical) is plotted against the volume of live swine trade from one country to another (asymmetrical), which is presented on a log scale.



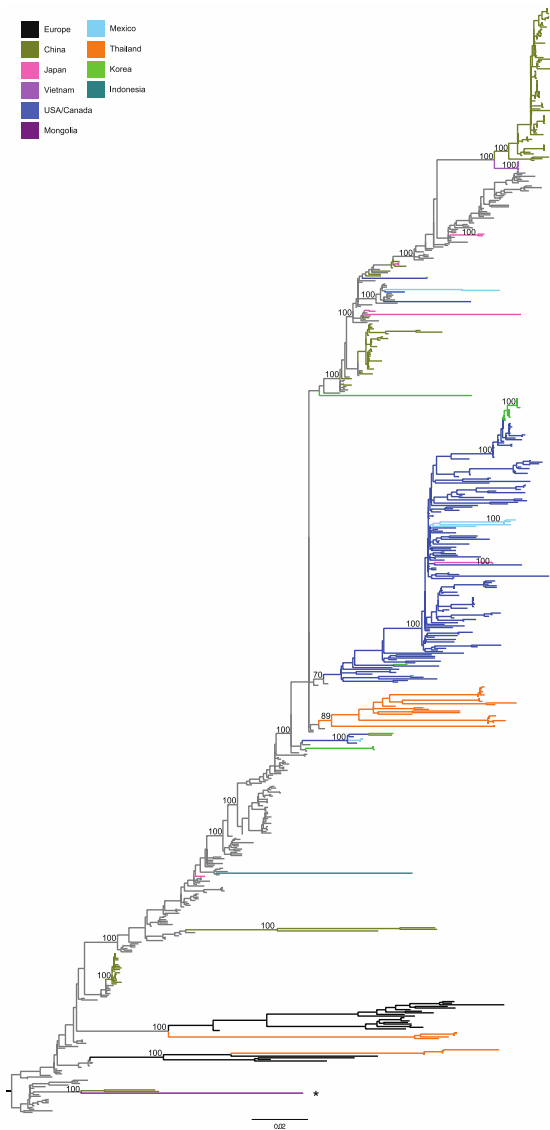

**Supplementary Fig. 11. Maximum likelihood phylogeny of human and swine H3 sequences.** Phylogenetic relationships of full-length H3 sequences from 689 influenza viruses collected globally from humans and swine during 1968-2013, including all data from Asian swine, estimated using a maximum likelihood method. Branch lengths are drawn to scale, and bootstrap values > 70% are provided for key nodes. The asterisk denotes a new putative viral migration event between Asian countries, not evident in the analysis of whole-genome sequence data. However, only three sequences associated with this clade are available: A/sw/Hong Kong/81/1978(H3N2), A/sw/Hong Kong/126/1982(H3N2), and A/sw/Inner Mongolia/547/2001(H3N2).

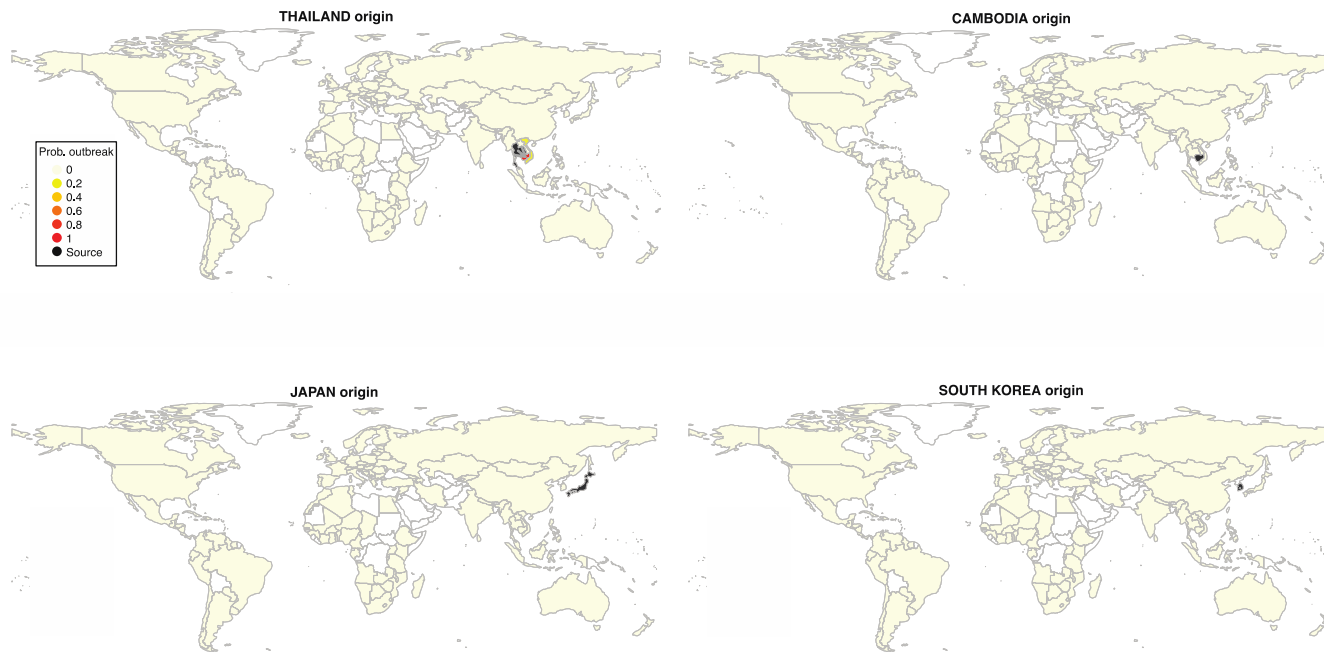

**Supplementary Fig. 12. Maps of simulated spread of influenza viruses via live swine trade flows.** Simulated spread of an influenza virus from a seed country (shaded in black) to 146 countries for which live swine trade is available from the United Nations Commodity Trade Statistics Database (available at <http://comtrade.un.org>). Probability of an outbreak is shaded from light yellow (probability of 0) to red (probability of 1).

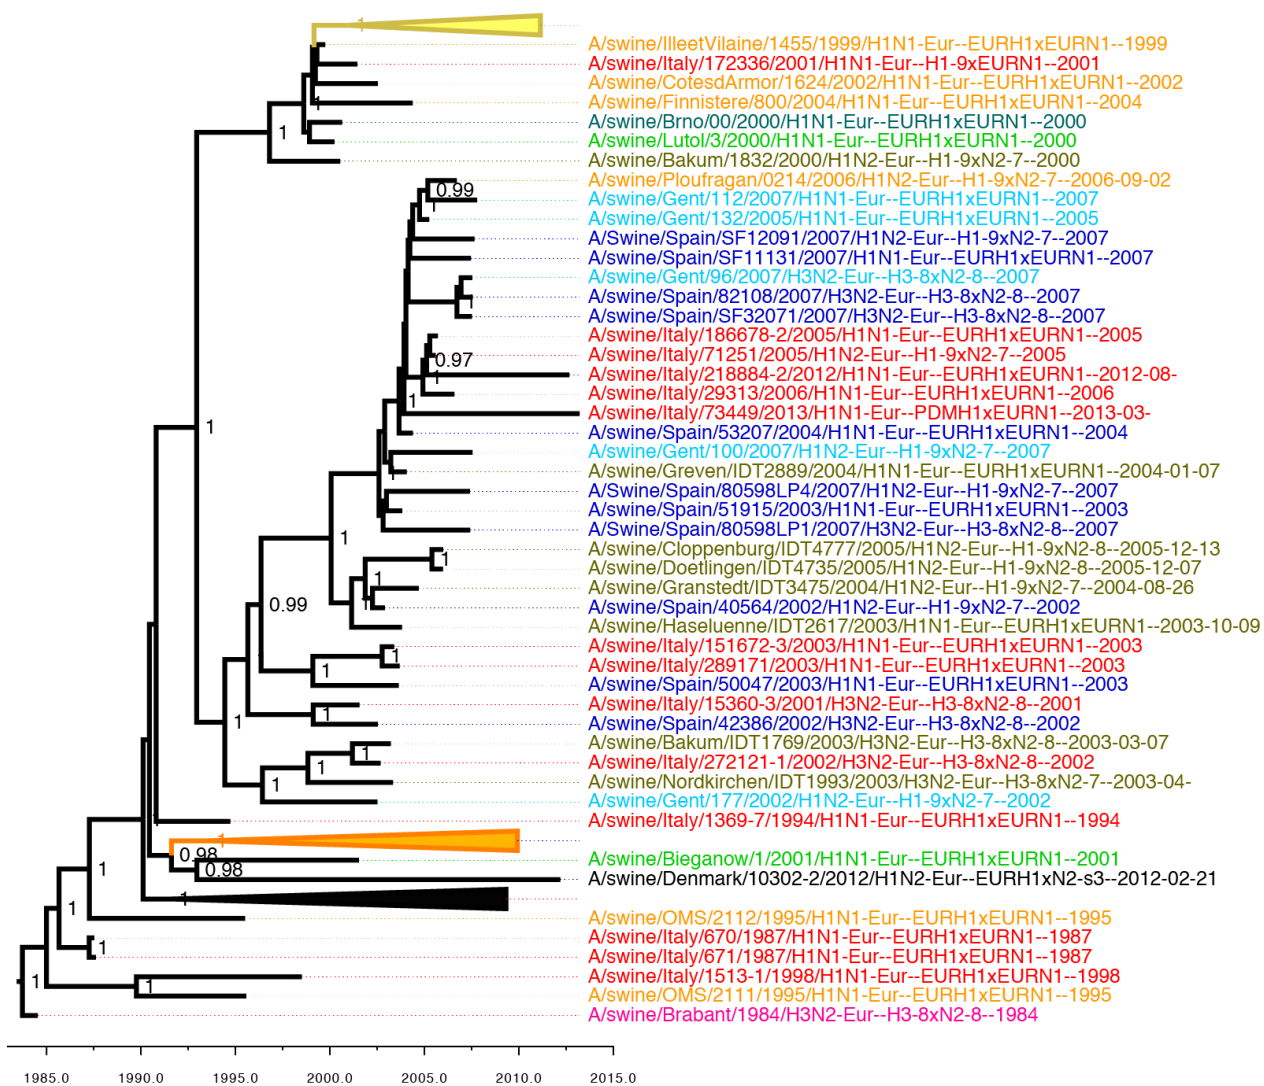

**Supplementary Fig. 13. Time-scaled MCC tree of PB2 segments from Eurasian swine.** Viruses from European countries have been shaded by color: Belgium = light blue, Czech Republic = dark green, Denmark = black, France = yellow, Germany = gold, Italy = red, Netherlands = pink, Poland = light green, and Spain = dark blue. For clarity a clade of viruses from England has been collapsed (black triangle). Viruses from China and Thailand have also been collapse (yellow and orange triangles, respectively).

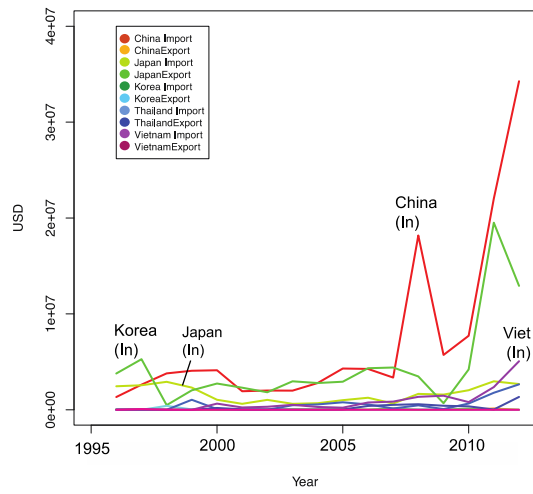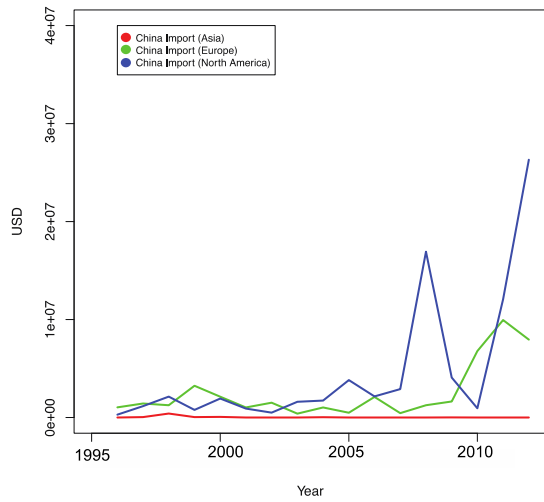

**Supplementary Fig. 14. Trends in live swine trade volume (USD) during 1996-2012 for (a) Asian countries and (b) China.**

**Supplementary Table 1. Times to the Most Recent Common Ancestor (tMRCA).** Estimates for the timing of the spatial movements associated with introductions 1-18 (Fig. 2), summarized across the eight genome segments of the influenza A virus. The mean of the estimates across the genome segments is provided, as well as the range representing the highest and lowest estimates across the segments, for the two nodes representing the estimated temporal range for spatial movement in swine (e.g., introduction 1 is estimated to have spread from the US to China during 1974.44 - 1974.94) and the most recently sampled virus from a given introduction (e.g., 1978.02 for intro 1). Introduction 16 was only evident for one segment (H1) and therefore does not have a range.

| Intro | Mean    |          |         | Range            |                  |                  |
|-------|---------|----------|---------|------------------|------------------|------------------|
|       |         |          |         |                  |                  |                  |
| 1     | 1974.44 | 1974.94  | 1978.02 | 1973.42; 1975.16 | 1973.91; 1975.59 | 1978.02; 1978.02 |
| 2     | 1976.32 | 1977.65  | 1981.0  | 1975.66; 1976.99 | 1977.16; 1978.15 | 1981; 1981       |
| 3     | 1976.44 | 1977.52  | 2005.87 | 1975.55; 1976.84 | 1975.88; 1978.27 | 2005; 2006       |
| 4     | 1976.98 | 1985.49  | 1993.31 | 1975.66; 1977.89 | 1984.3; 1986.12  | 1993.31; 1993.31 |
| 5     | 1977.16 | 1978.34  | 1979.99 | 1975.17; 1977.84 | 1975.56; 1979.16 | 1979.99; 1979.99 |
| 6     | 1980.87 | 1994.14  | 2009.48 | 1977.1; 1984.64  | 1993.3; 1994.98  | 2009.04; 2009.92 |
| 7     | 1988.14 | 1990.32  | 2009.5  | 1987.0; 1990.13  | 1989.02; 1992.8  | 2009.04; 2009.88 |
| 8     | 1990.36 | 1990.85  | 2010.25 | 1989.84; 1990.68 | 1990.12; 1991.27 | 2009.84; 2010.83 |
| 9     | 1998.01 | 2000.15  | 2010.63 | 1997.17; 1999.34 | 1997.97; 2001.77 | 2010.17; 2010.95 |
| 10    | 2001.49 | 2004.87  | 2012.32 | 2000.16; 2004.03 | 2001.94; 2007.76 | 2012.18; 2013.32 |
| 11    | 2005.50 | 2006.52  | 2011.83 | 2004.81; 2006.45 | 2005.34; 2006.45 | 2011.81; 2006.45 |
| 12    | 2011.11 | 2011.3   | 2013.00 | 2010.6; 2011.51  | 2010.69; 2011.65 | 2012.24; 2013.31 |
| 13    | 1991.82 | 1993.81  | 2009.90 | 1990.65; 1994.33 | 1992.18; 1995.43 | 2009.88; 2009.92 |
| 14    | 1993.61 | 2000.565 | 2009.91 | 1990.07; 1997.15 | 2000.08; 2001.05 | 2009.91; 2009.92 |
| 15    | 1999.68 | 2001.22  | 2011.1  | 1999.15; 2000.69 | 2000.28; 2002.03 | 2011.1; 2011.1   |
| 16    | 2007.54 | 2013.26  | 2013.31 | -                | -                | -                |
| 17    | 1981.25 | 1999.17  | 2004    | 1981.02; 1981.48 | 1997.51; 2000.83 | 2004; 2004       |
| 18    | 1986.56 | 2000.84  | 2005    | 1982.37; 1990.76 | 1999.07; 2002.61 | 2005; 2005       |

**Supplementary Table 2. 'Markov jump' counts between countries.** Expected number of location state transitions along the branches of the inferred phylogenies, from which the heat-map presented in Fig. 4 was generated.

|      | Arg  | Can          | Chi          | Eur         | Jap          | Kor          | Mex         | Thai         | USA          | Viet        | Total |
|------|------|--------------|--------------|-------------|--------------|--------------|-------------|--------------|--------------|-------------|-------|
| Arg  | -    | 0.04         | 0.02         | 0.04        | 0.01         | 0.01         | 0.01        | 0.06         | 0.03         | 0.01        | 0.24  |
| Can  | 0.09 | -            | 0.22         | 0.17        | 0.10         | <b>4.47</b>  | <b>4.60</b> | 0.18         | <b>68.61</b> | 0.24        | 78.69 |
| Chi  | 0.02 | 0.19         | -            | 0.21        | 0.07         | <b>1.13</b>  | 0.12        | 0.16         | <b>2.59</b>  | <b>2.75</b> | 7.25  |
| Eur  | 0.06 | 0.12         | <b>8.22</b>  | -           | 0.09         | 0.09         | 0.10        | <b>17.83</b> | 0.09         | 0.07        | 26.67 |
| Jap  | 0.01 | <b>1.10</b>  | 0.08         | <b>2.33</b> | -            | 0.07         | 0.08        | 0.09         | <b>1.43</b>  | 0.06        | 5.25  |
| Kor  | 0.02 | 0.14         | 0.10         | 0.08        | 0.04         | -            | 0.12        | 0.10         | <b>3.47</b>  | 0.13        | 4.19  |
| Mex  | 0.02 | 0.09         | 0.06         | 0.07        | 0.03         | 0.08         | -           | 0.08         | 0.09         | 0.09        | 0.61  |
| Thai | 0.02 | 0.07         | 0.05         | 0.33        | 0.03         | 0.04         | 0.05        | -            | 0.04         | 0.04        | 0.66  |
| USA  | 0.23 | <b>91.92</b> | <b>40.49</b> | <b>5.59</b> | <b>15.02</b> | <b>23.38</b> | <b>6.42</b> | <b>5.25</b>  | -            | <b>3.41</b> | 191.7 |
| Viet | 0.03 | 0.08         | <b>2.00</b>  | 0.07        | 0.03         | 0.11         | 0.12        | 0.09         | 0.08         | -           | 2.62  |
| Tot  | 0.50 | 93.76        | 51.25        | 8.88        | 15.42        | 29.39        | 11.61       | 23.84        | 76.44        | 6.80        |       |



**Supplementary Table 3. Viruses sequenced for this study.** Swine influenza A viruses from North America (Canada, Mexico, and United States) that were sequenced for this study at the J Craig Venter Institute, Rockville, MD (n = 240). GenBank accession numbers provided for PB2 segment.

| <b>Virus name</b>                  | <b>Country</b> | <b>Year</b> | <b>Accession</b> |
|------------------------------------|----------------|-------------|------------------|
| A/swine/Alberta/00805/2005(H3N2)   | Canada         | 10/10/05    | AHB22080         |
| A/swine/Alberta/SG1405/2005(H3N2)  | Canada         | 10/7/05     | AHB22068         |
| A/swine/Alberta/SG1415/2006(H1N1)  | Canada         | 3/13/06     | AHB22507         |
| A/swine/Arkansas/01460/2007(H1N1)  | USA            | 1/31/07     | AHB21170         |
| A/swine/Arkansas/02598/2009(H3N2)  | USA            | 2/12/09     | AHB23070         |
| A/swine/Arkansas/02720/2009(H1N2)  | USA            | 4/6/09      | AHB23809         |
| A/swine/Arkansas/02863/2009(H3N2)  | USA            | 6/26/09     | AHB23094         |
| A/swine/Arkansas/02927/2009(H1N2)  | USA            | 12/2/09     | AHB23082         |
| A/swine/Arkansas/SG1241/2006(H1N1) | USA            | 5/2/06      | AHB21014         |
| A/swine/Arkansas/SG1295/2008(H3N2) | USA            | 5/15/08     | AHB21376         |
| A/swine/Arkansas/SG1297/2008(H3N2) | USA            | 10/15/08    | AHB21388         |
| A/swine/Arkansas/SG1298/2008(H3N2) | USA            | 12/30/08    | AHB21400         |
| A/swine/Arkansas/SG1319/2009(H3N2) | USA            | 1/14/09     | AHB23798         |
| A/swine/Arkansas/SG1323/2009(H1N1) | USA            | 10/12/09    | AHB21579         |
| A/swine/Arkansas/SG1327/2009(H1N1) | USA            | 10/30/09    | AHB23833         |
| A/swine/Arkansas/SG1327/2009(H1N1) | USA            | 10/30/09    | AHB22389         |
| A/swine/Arkansas/SG1375/2011(H1N2) | USA            | 8/17/11     | AHB21840         |
| A/swine/Arkansas/SG1376/2011(H1N2) | USA            | 1/26/11     | AHB21852         |
| A/swine/Arkansas/SG1377/2011(H1N2) | USA            | 4/29/11     | AHB21864         |
| A/swine/Arkansas/SG1378/2011(H1N2) | USA            | 6/16/11     | AHB21876         |
| A/swine/Arkansas/SG1381/2011(H1N2) | USA            | 9/1/11      | AHB24574         |
| A/swine/Arkansas/SG1382/2011(H1N2) | USA            | 6/14/11     | AHB24586         |
| A/swine/Arkansas/SG1383/2011(H1N2) | USA            | 9/1/11      | AHB21888         |
| A/swine/Arkansas/SG1384/2011(H1N2) | USA            | 7/13/11     | AHB21900         |

|                                           |        |          |          |
|-------------------------------------------|--------|----------|----------|
| A/swine/Arkansas/SG1499/2010(H1N1)        | USA    | 8/11/10  | AHB23116 |
| A/swine/British Columbia/00633/2005(H3N2) | Canada | 5/19/05  | AHB22056 |
| A/swine/Colorado/02875/2009(H1N2)         | USA    | 7/21/09  | AHB23105 |
| A/swine/Colorado/SG1322/2009(H1N1)        | USA    | 8/26/09  | AHB21567 |
| A/swine/Georgia/02604/2009(H3N2)          | USA    | 2/20/09  | AHB21603 |
| A/swine/Georgia/SG1251/2006(H1N1)         | USA    | 5/12/06  | AHB22329 |
| A/swine/Illinois/00303/2004(H3N2)         | USA    | 5/18/04  | AHB20891 |
| A/swine/Illinois/01131/2006(H3N2)         | USA    | 5/5/06   | AHB21158 |
| A/swine/Illinois/02166/2008(H1N1)         | USA    | 5/1/08   | AHB22377 |
| A/swine/Illinois/02166/2008(H1N1)         | USA    | 5/1/08   | AHB21543 |
| A/swine/Illinois/02626/2009(H1N1)         | USA    | 1/29/09  | AHB21699 |
| A/swine/Illinois/02757/2009(H1N1)         | USA    | 4/28/09  | AHB21711 |
| A/swine/Illinois/02957/2010(H1N1)         | USA    | 1/26/10  | AHB21804 |
| A/swine/Illinois/SG1398/2011(H1N2)        | USA    | 8/26/11  | AHB24645 |
| A/swine/Indiana/04254/2011(H1N2)          | USA    | 3/31/11  | AHB21996 |
| A/swine/Iowa/00186/2003(H3N2)             | USA    | 10/2/03  | AHB22578 |
| A/swine/Iowa/00250/2004(H1N1)             | USA    | 2/19/04  | AHB22758 |
| A/swine/Iowa/02204/2008(H3N2)             | USA    | 6/11/08  | AHB23784 |
| A/swine/Iowa/03734/2011(H3N2)             | USA    | 1/24/11  | AHB21984 |
| A/swine/Iowa/13B093/2013(H1N2)            | USA    | 2/26/13  | AHA98542 |
| A/swine/Iowa/13C019/2013(H3N2)            | USA    | 3/26/13  | AHA98565 |
| A/swine/Iowa/13C020/2013(H3N2)            | USA    | 3/26/13  | AHA98576 |
| A/swine/Iowa/13C029/2013(H3N2)            | USA    | 3/26/13  | AHA98587 |
| A/swine/Iowa/13C038/2013(H3N2)            | USA    | 3/26/13  | AHA98554 |
| A/swine/Iowa/13C040/2013(H3N2)            | USA    | 3/26/13  | AHA98598 |
| A/swine/Iowa/SG1368/2010(H1N1)            | USA    | 8/3/10   | AHB24523 |
| A/swine/Iowa/SG1401/2011(H1N1)            | USA    | 10/5/11  | AHB22008 |
| A/swine/Iowa/SG1469/2004(H3N2)            | USA    | 10/14/04 | AHB22794 |

|                                    |        |          |          |
|------------------------------------|--------|----------|----------|
| A/swine/Kansas/00246/2004(H1N2)    | USA    | 2/5/04   | AHB22293 |
| A/swine/Kansas/00246/2004(H1N2)    | USA    | 2/5/04   | AHB20879 |
| A/swine/Kentucky/01569/2007(H1N1)  | USA    | 4/10/07  | AHB21304 |
| A/swine/Kentucky/02116/2008(H1N1)  | USA    | 4/2/08   | AHB21435 |
| A/swine/Kentucky/02564/2009(H1N2)  | USA    | 1/30/09  | AHB21615 |
| A/swine/Kentucky/02573/2009(H1N2)  | USA    | 2/10/09  | AHB21627 |
| A/swine/Kentucky/SG1277/2007(H1N1) | USA    | 3/16/07  | AHB21254 |
| A/swine/Manitoba/00446/2005(H3N2)  | Canada | 1/25/05  | AHB22495 |
| A/swine/Manitoba/00446/2005(H3N2)  | Canada | 1/25/05  | AHB22044 |
| A/swine/Manitoba/01093/2006)       | Canada | 4/12/06  | AHB24732 |
| A/swine/Manitoba/01179/2006(H3N2)  | Canada | 6/29/06  | AHB22116 |
| A/swine/Manitoba/01642/2007(H3N2)  | Canada | 6/20/07  | AHB22128 |
| A/swine/Manitoba/01643/2007(H3N2)  | Canada | 6/20/07  | AHB22140 |
| A/swine/Manitoba/01781/2007(H1N1)  | Canada | 10/2/07  | AHB22519 |
| A/swine/Manitoba/01781/2007(H1N1)  | Canada | 10/2/07  | AHB22152 |
| A/swine/Manitoba/01782/2007(H3N2)  | Canada | 10/3/07  | AHB22164 |
| A/swine/Manitoba/02182/2008(H3N2)  | Canada | 5/30/08  | AHB22176 |
| A/swine/Manitoba/02185/2008(H1N1)  | Canada | 5/13/08  | AHB24754 |
| A/swine/Manitoba/02862/2009(H3N2)  | Canada | 7/1/09   | AHB22212 |
| A/swine/Manitoba/SG1431/2008(H3N2) | Canada | 6/17/08  | AHB22188 |
| A/swine/Manitoba/SG1432/2008(H3N2) | Canada | 6/17/08  | AHB22200 |
| A/swine/Manitoba/SG1438/2011(H3N2) | Canada | 11/8/11  | AHB22236 |
| A/swine/Mexico/3146/2010(H1N1)     | Mexico | 9/16/10  | AHB22554 |
| A/swine/Mexico/SG1442/2010(H3N2)   | Mexico | 11/29/10 | AHB22247 |
| A/swine/Mexico/SG1443/2010(H1N1)   | Mexico | 12/2/10  | AHB22258 |
| A/swine/Mexico/SG1444/2011(H3N2)   | Mexico | 10/21/11 | AHB22566 |
| A/swine/Mexico/SG1444/2011(H3N2)   | Mexico | 10/21/11 | AHB22270 |
| A/swine/Mexico/SG1445/2011(N1)     | Mexico | 10/21/11 | AHB82086 |

|                                     |        |          |          |
|-------------------------------------|--------|----------|----------|
| A/swine/Mexico/SG1447/2011(H3N2)    | Mexico | 10/21/11 | AHB24775 |
| A/swine/Mexico/SG1448/2011(H3N2)    | Mexico | 10/21/11 | AHB24786 |
| A/swine/Mexico/SG1449/2011(H3N2)    | Mexico | 10/21/11 | AHB22281 |
| A/swine/Mexico/SG1450/2011(H1N1)    | Mexico | 11/9/11  | AHB24797 |
| A/swine/Minnesota/00352/2004(H1N1)  | USA    | 7/23/04  | AHB22770 |
| A/swine/Minnesota/00401/2004(H1N1)  | USA    | 9/9/04   | AHB22782 |
| A/swine/Minnesota/00938/2005(H1N1)  | USA    | 12/30/05 | AHB21002 |
| A/swine/Minnesota/00991/2006(H1N1)  | USA    | 2/7/06   | AHB21146 |
| A/swine/Minnesota/01136/2006(H1N1)  | USA    | 5/11/06  | AHB21134 |
| A/swine/Minnesota/01604/2007(H1N2)  | USA    | 5/1/07   | AHB21340 |
| A/swine/Minnesota/01882/2007(H1N1)  | USA    | 12/5/07  | AHB21316 |
| A/swine/Minnesota/02817/2009(H1N1)  | USA    | 5/8/09   | AHB22413 |
| A/swine/Minnesota/02817/2009(H1N1)  | USA    | 5/8/09   | AHB21687 |
| A/swine/Minnesota/02976/2010(H1N1)  | USA    | 1/12/10  | AHB22448 |
| A/swine/Minnesota/3128/2010(H1N2)   | USA    | 9/24/10  | AHB21828 |
| A/swine/Minnesota/SG1236/2005(H3N2) | USA    | 4/22/05  | AHB20978 |
| A/swine/Minnesota/SG1238/2005(H3N2) | USA    | 6/2/05   | AHB20990 |
| A/swine/Minnesota/SG1261/2006(H1N1) | USA    | 11/8/06  | AHB22341 |
| A/swine/Minnesota/SG1261/2006(H1N1) | USA    | 11/8/06  | AHB21122 |
| A/swine/Minnesota/SG1293/2007(H3N2) | USA    | 4/6/07   | AHB21352 |
| A/swine/Minnesota/SG1294/2007(H3N2) | USA    | 4/5/07   | AHB21364 |
| A/swine/Minnesota/SG1317/2008(H1N1) | USA    | 4/17/08  | AHB21555 |
| A/swine/Minnesota/SG1340/2009(H1N1) | USA    | 10/22/09 | AHB21675 |
| A/swine/Minnesota/SG1370/2010(H1N2) | USA    | 11/23/10 | AHB21816 |
| A/swine/Minnesota/SG1371/2010(H1N1) | USA    | 11/19/10 | AHB24535 |
| A/swine/Minnesota/SG1395/2011(H1N2) | USA    | 5/6/11   | AHB24634 |
| A/swine/Minnesota/SG1402/2011(H1N2) | USA    | 10/6/11  | AHB22020 |
| A/swine/Minnesota/SG1403/2011(H1N2) | USA    | 9/27/11  | AHB22483 |

|                                         |     |          |          |
|-----------------------------------------|-----|----------|----------|
| A/swine/Minnesota/SG1403/2011(H1N2)     | USA | 9/27/11  | AHB22032 |
| A/swine/Minnesota/SG1404/2011(H1N1)     | USA | 8/31/11  | AHB24657 |
| A/swine/Minnesota/SG1454/2003(H1N1)     | USA | 10/2/03  | AHB22614 |
| A/swine/Minnesota/SG1470/2004(H1N1)     | USA | 8/13/04  | AHB22806 |
| A/swine/Nebraska/00178/2003(H1N1)       | USA | 8/29/03  | AHB22590 |
| A/swine/Nebraska/00188/2003(H3N2)       | USA | 10/3/03  | AHB22626 |
| A/swine/Nebraska/00386/2004(H3N2)       | USA | 8/13/04  | AHB23228 |
| A/swine/Nebraska/01711/2007(H3N2)       | USA | 7/31/07  | AHB21328 |
| A/swine/North Carolina/00371/2004(H1N1) | USA | 10/7/04  | AHB22698 |
| A/swine/North Carolina/00378/2004(H1N1) | USA | 8/3/04   | AHB22746 |
| A/swine/North Carolina/00850/2005(H1N1) | USA | 11/8/05  | AHB24809 |
| A/swine/North Carolina/00925/2005(H1N1) | USA | 12/13/05 | AHB22914 |
| A/swine/North Carolina/00950/2006(H3N2) | USA | 9/27/06  | AHB24821 |
| A/swine/North Carolina/01052/2006(H3N2) | USA | 3/14/06  | AHB22962 |
| A/swine/North Carolina/01169/2006(H1N2) | USA | 6/22/06  | AHB21086 |
| A/swine/North Carolina/01216/2006(H3N2) | USA | 8/16/06  | AHB22986 |
| A/swine/North Carolina/01312/2006(H3N2) | USA | 11/16/06 | AHB21098 |
| A/swine/North Carolina/01469/2007(H3N2) | USA | 2/21/07  | AHB23010 |
| A/swine/North Carolina/01484/2006(H3N2) | USA | 11/3/06  | AHB21110 |
| A/swine/North Carolina/01506/2006(H3N2) | USA | 10/31/06 | AHB22950 |
| A/swine/North Carolina/01514/2007(H1N1) | USA | 1/26/07  | AHB23034 |
| A/swine/North Carolina/01550/2007(H1N1) | USA | 4/4/07   | AHB23046 |
| A/swine/North Carolina/01591/2007(H1N1) | USA | 4/24/07  | AHB22998 |
| A/swine/North Carolina/01855/2007(H1N1) | USA | 11/14/07 | AHB23022 |
| A/swine/North Carolina/01930/2007(H3N2) | USA | 7/27/07  | AHB21292 |
| A/swine/North Carolina/02249/2008(H1N2) | USA | 7/30/08  | AHB21471 |
| A/swine/North Carolina/02403/2008(H1N1) | USA | 9/12/08  | AHB21507 |
| A/swine/North Carolina/03289/2011(H3N2) | USA | 1/7/11   | AHB21912 |

|                                           |     |          |          |
|-------------------------------------------|-----|----------|----------|
| A/swine/North Carolina/SG1197/2004(H3N2)  | USA | 12/30/04 | AHB20855 |
| A/swine/North Carolina/SG1199/2004(H3N2)  | USA | 12/2/04  | AHB82076 |
| A/swine/North Carolina/SG1229/2005(H1N1)  | USA | 12/6/05  | AHB23675 |
| A/swine/North Carolina/SG1230/2005(H3N2)  | USA | 3/16/05  | AHB20966 |
| A/swine/North Carolina/SG1255/2006(H1N1)  | USA | 5/18/06  | AHB23713 |
| A/swine/North Carolina/SG1278/2007(H1N1)  | USA | 11/20/07 | AHB21266 |
| A/swine/North Carolina/SG1279/2007(H1N1)  | USA | 10/23/07 | AHB23755 |
| A/swine/North Carolina/SG1281/2007(H1N1)  | USA | 2/1/07   | AHB22353 |
| A/swine/North Carolina/SG1282/2007(mixed) | USA | 10/25/07 | AHB21280 |
| A/swine/North Carolina/SG1306/2008(H3N2)  | USA | 7/3/08   | AHB21447 |
| A/swine/North Carolina/SG1307/2008(H1N1)  | USA | 9/16/08  | AHB22365 |
| A/swine/North Carolina/SG1307/2008(H1N1)  | USA | 9/16/08  | AHB21459 |
| A/swine/North Carolina/SG1309/2008(H1N1)  | USA | 10/23/08 | AHB21483 |
| A/swine/North Carolina/SG1310/2008(H1N1)  | USA | 11/11/08 | AHB21495 |
| A/swine/North Carolina/SG1313/2008(H1N1)  | USA | 9/26/08  | AHB21519 |
| A/swine/North Carolina/SG1314/2008(H1N1)  | USA | 9/16/08  | AHB21531 |
| A/swine/North Carolina/SG1334/2009(H1N1)  | USA | 1/20/09  | AHB21639 |
| A/swine/North Carolina/SG1335/2009(H1N2)  | USA | 1/20/09  | AHB22401 |
| A/swine/North Carolina/SG1335/2009(H1N2)  | USA | 1/20/09  | AHB21651 |
| A/swine/North Carolina/SG1338/2009(H3N2)  | USA | 2/6/09   | AHB21663 |
| A/swine/North Carolina/SG1357/2010(H1N2)  | USA | 1/13/10  | AHB21746 |
| A/swine/North Carolina/SG1358/2010(H3N2)  | USA | 9/24/10  | AHB21758 |
| A/swine/North Carolina/SG1359/2010(H1N2)  | USA | 2/19/10  | AHB24464 |
| A/swine/North Carolina/SG1360/2010(H1N2)  | USA | 4/21/10  | AHB21769 |
| A/swine/North Carolina/SG1361/2010(H1N1)  | USA | 6/18/10  | AHB21781 |
| A/swine/North Carolina/SG1363/2010(H1)    | USA | 4/1/10   | AHB82082 |
| A/swine/North Carolina/SG1364/2010(H3N2)  | USA | 11/24/10 | AHB24501 |
| A/swine/North Carolina/SG1364/2010(H3N2)  | USA | 11/24/10 | AHB22437 |

|                                          |     |          |          |
|------------------------------------------|-----|----------|----------|
| A/swine/North Carolina/SG1365/2010(H1N2) | USA | 10/29/10 | AHB21793 |
| A/swine/North Carolina/SG1387/2011(H1N1) | USA | 9/30/11  | AHB21936 |
| A/swine/North Carolina/SG1388/2011(H1N2) | USA | 3/25/11  | AHB21948 |
| A/swine/North Carolina/SG1389/2011(H1N2) | USA | 3/18/11  | AHB21960 |
| A/swine/North Carolina/SG1391/2011(H1N2) | USA | 3/30/11  | AHB21972 |
| A/swine/North Carolina/SG1394/2011(H1N2) | USA | 9/28/11  | AHB22471 |
| A/swine/North Carolina/SG1462/2004(H3N2) | USA | 3/3/04   | AHB22710 |
| A/swine/North Carolina/SG1463/2004(H1N1) | USA | 8/27/04  | AHB22722 |
| A/swine/North Carolina/SG1464/2004(H3N2) | USA | 3/10/04  | AHB22734 |
| A/swine/North Carolina/SG1477/2005(H1N1) | USA | 10/20/05 | AHB22878 |
| A/swine/North Carolina/SG1478/2005(H1N1) | USA | 5/5/05   | AHB22890 |
| A/swine/North Carolina/SG1479/2005(H1N1) | USA | 12/8/05  | AHB22902 |
| A/swine/Oklahoma/00130/2003(H1N1)        | USA | 8/12/03  | AHB23166 |
| A/swine/Oklahoma/00259/2004(H1N2)        | USA | 3/3/04   | AHB22674 |
| A/swine/Oklahoma/00518/2005(H3N2)        | USA | 3/1/05   | AHB22305 |
| A/swine/Oklahoma/00518/2005(H3N2)        | USA | 3/1/05   | AHB20930 |
| A/swine/Oklahoma/00606/2005(H3N2)        | USA | 5/4/05   | AHB23243 |
| A/swine/Oklahoma/00790/2005(H1N1)        | USA | 9/23/05  | AHB22830 |
| A/swine/Oklahoma/00801/2005(H1N1)        | USA | 10/4/05  | AHB22854 |
| A/swine/Oklahoma/01117/2006(H1N2)        | USA | 5/2/06   | AHB22317 |
| A/swine/Oklahoma/01139/2006(H1N1)        | USA | 5/17/06  | AHB22926 |
| A/swine/Oklahoma/01382/2006(H1N2)        | USA | 12/6/06  | AHB22938 |
| A/swine/Oklahoma/01741/2007(H1N2)        | USA | 8/23/07  | AHB21242 |
| A/swine/Oklahoma/02056/2008(H1N2)        | USA | 2/29/08  | AHB21424 |
| A/swine/Oklahoma/02107/2008(H1N2)        | USA | 4/2/08   | AHB21412 |
| A/swine/Oklahoma/02530/2009(H3N2)        | USA | 1/9/09   | AHB23821 |
| A/swine/Oklahoma/02722/2009(H1N2)        | USA | 4/10/09  | AHB23058 |
| A/swine/Oklahoma/02985/2010(H3N2)        | USA | 3/10/10  | AHB24441 |

|                                         |        |          |          |
|-----------------------------------------|--------|----------|----------|
| A/swine/Oklahoma/02989/2010(H1N1)       | USA    | 3/12/10  | AHB24452 |
| A/swine/Oklahoma/SG1216/2005(H3N2)      | USA    | 3/3/05   | AHB20942 |
| A/swine/Oklahoma/SG1217/2005(H1N1)      | USA    | 12/6/05  | AHB20954 |
| A/swine/Oklahoma/SG1243/2006(H1N1)      | USA    | 10/6/06  | AHB21026 |
| A/swine/Oklahoma/SG1244/2006(H1N1)      | USA    | 6/7/06   | AHB21038 |
| A/swine/Oklahoma/SG1249/2006(H1N1)      | USA    | 6/7/06   | AHB23687 |
| A/swine/Oklahoma/SG1251/2010(H1N1)      | USA    | 9/24/10  | AHB21723 |
| A/swine/Oklahoma/SG1325/2009(H1N1)      | USA    | 2/4/09   | AHB21591 |
| A/swine/Oklahoma/SG1349/2010(H1N1)      | USA    | 9/24/10  | AHB22425 |
| A/swine/Oklahoma/SG1349/2010(H1N2)      | USA    | 11/10/10 | AHB24429 |
| A/swine/Oklahoma/SG1457/2004(H1N1)      | USA    | 9/23/04  | AHB22650 |
| A/swine/Oklahoma/SG1458/2004(H1N1)      | USA    | 9/1/04   | AHB22662 |
| A/swine/Oklahoma/SG1460/2004(H1N1)      | USA    | 8/26/04  | AHB22686 |
| A/swine/Oklahoma/SG1473/2005(H3N2)      | USA    | 9/23/05  | AHB22842 |
| A/swine/Oklahoma/SG1498/2010(H3N2)      | USA    | 11/11/10 | AHB24833 |
| A/swine/Oklahoma/SG1500/2010(H1N1)      | USA    | 10/19/10 | AHB23128 |
| A/swine/Oklahoma/SG1501/2010(mixed)     | USA    | 11/18/10 | AHB23141 |
| A/swine/Oklahoma/SG1501/2010(mixed)     | USA    | 11/18/10 | AHB23142 |
| A/swine/Quebec/00686/2005(H3N2)         | Canada | 9/14/05  | AHB24669 |
| A/swine/Quebec/01000/2006(H3N2)         | Canada | 2/23/06  | AHB82085 |
| A/swine/Quebec/01001/2006(H3N2)         | Canada | 2/23/06  | AHB22092 |
| A/swine/Quebec/01002/2006(H3N2)         | Canada | 2/23/06  | AHB24707 |
| A/swine/Saskatchewan/01114/2006(H3N2)   | Canada | 5/1/06   | AHB22104 |
| A/swine/Saskatchewan/01974/2008(H1N1)   | Canada | 1/8/08   | AHB24744 |
| A/swine/Saskatchewan/01974/2008(H1N1)   | Canada | 1/8/08   | AHB22531 |
| A/swine/Saskatchewan/02903/2009(H3N2)   | Canada | 9/24/09  | AHB22224 |
| A/swine/Saskatchewan/SD0001/2011(H3N2)  | Canada | 12/1/11  | AHB22543 |
| A/swine/South Carolina/01414/2006(H1N1) | USA    | 12/19/06 | AHB22974 |



|                                        |     |          |          |
|----------------------------------------|-----|----------|----------|
| A/swine/South Dakota/SG1453/2003(H3N2) | USA | 4/10/03  | AHB22602 |
| A/swine/Tennessee/00264/2004(H1N1)     | USA | 3/11/04  | AHB20867 |
| A/swine/Texas/00244/2004(H1N1)         | USA | 2/4/04   | AHB22638 |
| A/swine/Texas/00376/2004(H3N2)         | USA | 7/22/04  | AHB23193 |
| A/swine/Texas/00816/2005(H3N2)         | USA | 10/12/05 | AHB22866 |
| A/swine/Texas/00867/2005(H1N1)         | USA | 11/17/05 | AHB22818 |
| A/swine/Texas/01308/2006(H1N2)         | USA | 11/2/06  | AHB21050 |
| A/swine/Texas/01492/2007(H1N2)         | USA | 3/8/07   | AHB21230 |
| A/swine/Texas/01522/2007(H1N1)         | USA | 3/13/07  | AHB21182 |
| A/swine/Texas/01657/2007(H1N1)         | USA | 6/21/07  | AHB21218 |
| A/swine/Texas/01822/2007(H3N1)         | USA | 10/25/07 | AHB21206 |
| A/swine/Texas/03042/2010(H3N2)         | USA | 7/2/10   | AHB21735 |
| A/swine/Texas/SG1186/2004(H3N2)        | USA | 10/22/04 | AHB20833 |
| A/swine/Texas/SG1250/2006(H1N2)        | USA | 6/21/06  | AHB21062 |
| A/swine/Texas/SG1270/2007(H3N2)        | USA | 3/1/07   | AHB23744 |
| A/swine/Texas/SG1271/2007(H1N1)        | USA | 10/25/07 | AHB21194 |
| A/swine/Texas/SG1380/2011(H1N1)        | USA | 10/6/11  | AHB22460 |
| A/swine/Texas/SG1501/2010(H3N2)        | USA | 4/20/10  | AHB23154 |
| A/swine/Virginia/01359/2006(H1N1)      | USA | 11/28/06 | AHB21074 |
| A/swine/Virginia/SG1386/2011(H1N2)     | USA | 11/4/11  | AHB21924 |

**Supplementary Table 4. Sensitivity analysis for GLM model for 1990-2013 and 2000-2013 using an ‘epoch extension’.** Live swine trade was still found to be the only well-supported predictor of viral migration.

| Predictor                    | Inclusion probability (1990-2013) | Ln coefficient (1990-2013) | Inclusion probability (2000-2013) | Ln coefficient (2000-2013) |
|------------------------------|-----------------------------------|----------------------------|-----------------------------------|----------------------------|
| Distance                     | 0.014                             | -0.143                     | 2.109E-02                         | -9.933E-02                 |
| Swine trade                  | 1.000                             | 4.918                      | 1.000                             | 4.972                      |
| Swine pop size (origin)      | 6.659E-3                          | 0.047                      | 1.443E-02                         | -9.978E-02                 |
| Swine pop size (destination) | 0.017                             | -0.035                     | 1.665E-02                         | -3.479E-02                 |
| Swine import (o)             | 0.021                             | -0.024                     | 2.775E-02                         | 2.293E-02                  |
| Swine import (d)             | 0.021                             | -0.036                     | 1.887E-02                         | -8.445E-02                 |
| Swine export (o)             | 7.770E-3                          | 0.114                      | 1.443E-02                         | -8.251E-02                 |
| Swine export (d)             | 7.770E-3                          | 0.098                      | 5.549E-03                         | 3.037E-02                  |
| Swine pop change (o)         | 0.014                             | -0.073                     | 2.109E-02                         | -8.834E-02                 |
| Swine pop change (d)         | 0.019                             | 0.015                      | 3.108E-02                         | 3.520E-02                  |
| Sample size (o)              | 0.012                             | -0.097                     | 2.331E-02                         | -2.975E-02                 |
| Sample size (d)              | 8.879E-3                          | -0.113                     | 7.769E-03                         | 1.030E-01                  |

**Supplementary Table 5. Probabilities of viral invasion estimated from simulation model.** Probabilities of viral invasion for five seed countries (USA, Canada, China, Mexico, United Kingdom, and France) and for co-invasion by North American (USA and Canada) and European viruses, as visualized in Fig. 6.

| Country            | P(invasion) | Country              | P(invasion) | Country                | P(invasion) | Country              | P(invasion) |
|--------------------|-------------|----------------------|-------------|------------------------|-------------|----------------------|-------------|
| <i>USA source</i>  |             | <i>Canada source</i> |             | <i>China source</i>    |             | <i>Mexico source</i> |             |
| China              | 0.912       | USA                  | 0.911       | Hong Kong              | 0.913       | Costa Rica           | 0.087       |
| Hong Kong          | 0.912       | China                | 0.909       | Cambodia               | 0.693       | Guatemala            | 0.016       |
| Mexico             | 0.912       | Cuba                 | 0.909       | Japan                  | 0.06        | Cuba                 | 0.012       |
| Russian Federation | 0.912       | Hong Kong            | 0.909       | South Korea            | 0.039       | Japan                | 0.004       |
| South Korea        | 0.912       | Mexico               | 0.909       | Indonesia              | 0.038       |                      |             |
| Canada             | 0.911       | Russian Federation   | 0.909       | Mongolia               | 0.016       |                      |             |
| Venezuela          | 0.867       | South Korea          | 0.909       | Singapore              | 0.015       |                      |             |
| Cuba               | 0.796       | Venezuela            | 0.875       | Russian Federation     | 0.009       |                      |             |
| Japan              | 0.796       | Japan                | 0.798       | Austria                | 0.003       |                      |             |
| Chile              | 0.755       | Chile                | 0.769       | Albania                | 0.002       |                      |             |
| Cambodia           | 0.73        | Cambodia             | 0.745       | Belarus                | 0.002       |                      |             |
| Vietnam            | 0.683       | Vietnam              | 0.685       | Belgium                | 0.002       |                      |             |
|                    |             |                      |             | Bosnia and Herzegovina | 0.002       |                      |             |
| Brazil             | 0.625       | Brazil               | 0.625       | Croatia                | 0.002       |                      |             |
| Guatemala          | 0.5         | Philippines          | 0.516       | Czech Republic         | 0.002       |                      |             |
| Philippines        | 0.496       | Guatemala            | 0.5         | France                 | 0.002       |                      |             |
| Panama             | 0.453       | Thailand             | 0.485       | Georgia                | 0.002       |                      |             |
| Thailand           | 0.449       | Panama               | 0.424       | Germany                | 0.002       |                      |             |
| Ukraine            | 0.355       | Ukraine              | 0.368       | Greece                 | 0.002       |                      |             |
| Costa Rica         | 0.323       | Belarus              | 0.342       | Hungary                | 0.002       |                      |             |
| Belarus            | 0.315       | Costa Rica           | 0.326       | Italy                  | 0.002       |                      |             |
| Kazakhstan         | 0.315       | Czech Republic       | 0.324       |                        |             |                      |             |

|                        |       |                        |       |             |       |
|------------------------|-------|------------------------|-------|-------------|-------|
| Czech Republic         | 0.304 | Kazakhstan             | 0.307 | Latvia      | 0.002 |
| Singapore              | 0.302 | Poland                 | 0.29  | Lebanon     | 0.002 |
| Poland                 | 0.284 | Singapore              | 0.289 | Lithuania   | 0.002 |
| United Kingdom         | 0.278 | Ecuador                | 0.285 | Luxembourg  | 0.002 |
| Colombia               | 0.277 | Germany                | 0.282 | Montenegro  | 0.002 |
| Ecuador                | 0.271 | United Kingdom         | 0.27  | Netherlands | 0.002 |
| Lithuania              | 0.264 | Lithuania              | 0.264 | Poland      | 0.002 |
| Germany                | 0.262 | Belgium                | 0.263 | Portugal    | 0.002 |
| Georgia                | 0.25  | Georgia                | 0.26  | Romania     | 0.002 |
| Croatia                | 0.249 | Colombia               | 0.254 | Serbia      | 0.002 |
| Belgium                | 0.248 | Croatia                | 0.253 | Slovakia    | 0.002 |
| France                 | 0.247 | Spain                  | 0.251 | Spain       | 0.002 |
| Spain                  | 0.242 | France                 | 0.25  | Thailand    | 0.002 |
| Netherlands            | 0.241 | Austria                | 0.248 | Ukraine     | 0.002 |
| Romania                | 0.241 | Netherlands            | 0.248 | Bulgaria    | 0.001 |
| Austria                | 0.24  | Italy                  | 0.247 | Colombia    | 0.001 |
| Italy                  | 0.24  | Romania                | 0.247 | Denmark     | 0.001 |
| Hungary                | 0.239 | Hungary                | 0.244 | Kazakhstan  | 0.001 |
| Latvia                 | 0.238 | Slovakia               | 0.244 | Mozambique  | 0.001 |
| Slovakia               | 0.238 | Bosnia and Herzegovina | 0.242 | Slovenia    | 0.001 |
| Argentina              | 0.235 | Latvia                 | 0.242 |             |       |
| Portugal               | 0.233 | Luxembourg             | 0.241 |             |       |
| Bosnia and Herzegovina | 0.232 | Portugal               | 0.241 |             |       |
| Luxembourg             | 0.232 | Montenegro             | 0.24  |             |       |
| Montenegro             | 0.231 | Slovenia               | 0.227 |             |       |
| Malaysia               | 0.211 | Argentina              | 0.218 |             |       |
| Slovenia               | 0.207 | Greece                 | 0.206 |             |       |
| Bulgaria               | 0.202 | Peru                   | 0.202 |             |       |

|                      |       |
|----------------------|-------|
| Greece               | 0.188 |
| Albania              | 0.186 |
| Serbia               | 0.186 |
| Peru                 | 0.185 |
| India                | 0.16  |
| Dominican Republic   | 0.116 |
| Indonesia            | 0.081 |
| Denmark              | 0.068 |
| El Salvador          | 0.066 |
| Honduras             | 0.057 |
| Switzerland          | 0.034 |
| Paraguay             | 0.033 |
| Ireland              | 0.032 |
| Armenia              | 0.026 |
| Jamaica              | 0.025 |
| Malta                | 0.025 |
| Netherlands Antilles | 0.025 |
| Syria                | 0.023 |
| South Africa         | 0.022 |
| Guyana               | 0.02  |
| Australia            | 0.017 |
| Belize               | 0.017 |
| Saint Lucia          | 0.017 |
| Cyprus               | 0.016 |
| Kyrgyzstan           | 0.013 |
| Mongolia             | 0.013 |
| Uruguay              | 0.013 |
| Sweden               | 0.011 |
| Estonia              | 0.009 |
| Aruba                | 0.006 |

|                      |       |
|----------------------|-------|
| Malaysia             | 0.198 |
| Albania              | 0.187 |
| Bulgaria             | 0.181 |
| Serbia               | 0.181 |
| India                | 0.167 |
| Dominican Republic   | 0.133 |
| Indonesia            | 0.094 |
| El Salvador          | 0.081 |
| Denmark              | 0.077 |
| Honduras             | 0.05  |
| Paraguay             | 0.045 |
| Ireland              | 0.037 |
| Switzerland          | 0.034 |
| Syria                | 0.032 |
| Australia            | 0.028 |
| Jamaica              | 0.025 |
| Netherlands Antilles | 0.023 |
| South Africa         | 0.022 |
| Armenia              | 0.019 |
| Kyrgyzstan           | 0.019 |
| Cyprus               | 0.018 |
| Malta                | 0.018 |
| Estonia              | 0.017 |
| Sweden               | 0.017 |
| Belize               | 0.016 |
| Guyana               | 0.016 |
| Mongolia             | 0.014 |
| Uruguay              | 0.012 |
| Saint Lucia          | 0.01  |
| Tunisia              | 0.008 |

|               |       |
|---------------|-------|
| Bahamas       | 0.005 |
| Tunisia       | 0.004 |
| Israel        | 0.003 |
| Kenya         | 0.003 |
| Cote d Ivoire | 0.002 |
| Lebanon       | 0.001 |
| Mozambique    | 0.001 |
| Norway        | 0.001 |
| Seychelles    | 0.001 |

|               |       |
|---------------|-------|
| Kenya         | 0.006 |
| Aruba         | 0.005 |
| Bahamas       | 0.004 |
| Seychelles    | 0.003 |
| Grenada       | 0.002 |
| Israel        | 0.002 |
| Lebanon       | 0.002 |
| Norway        | 0.002 |
| Suriname      | 0.002 |
| Cote d Ivoire | 0.001 |
| Rwanda        | 0.001 |
| Tanzania      | 0.001 |

| Country                      | P(invasion) |
|------------------------------|-------------|
| <i>United Kingdom source</i> |             |
| Russian Federation           | 0.877       |
| Germany                      | 0.863       |
| China                        | 0.852       |
| Spain                        | 0.801       |
| Ukraine                      | 0.795       |
| Netherlands                  | 0.794       |
| Belgium                      | 0.791       |
| Italy                        | 0.79        |
| France                       | 0.784       |

| Country              | P(invasion) |
|----------------------|-------------|
| <i>France source</i> |             |
| Austria              | 0.904       |
| Belgium              | 0.904       |
| Croatia              | 0.904       |
| Czech Republic       | 0.904       |
| Germany              | 0.904       |
| Hungary              | 0.904       |
| Italy                | 0.904       |
| Lithuania            | 0.904       |
| Luxembourg           | 0.904       |

| Country                                               | P(invasion) |
|-------------------------------------------------------|-------------|
| <i>North America and Europe sources (co-invasion)</i> |             |
| Russian Federation                                    | 0.824       |
| China                                                 | 0.801       |
| South Korea                                           | 0.698       |
| Hong Kong                                             | 0.602       |
| Cambodia                                              | 0.375       |
| Ukraine                                               | 0.321       |
| Czech Republic                                        | 0.275       |
| Poland                                                | 0.257       |
| France                                                | 0.247       |

|                        |       |
|------------------------|-------|
| Romania                | 0.78  |
| Croatia                | 0.762 |
| Czech Republic         | 0.759 |
| Austria                | 0.757 |
| Hungary                | 0.757 |
| Poland                 | 0.755 |
| Slovakia               | 0.755 |
| Luxembourg             | 0.752 |
| Portugal               | 0.752 |
| Lithuania              | 0.751 |
| Montenegro             | 0.748 |
| Bosnia and Herzegovina | 0.745 |
| Georgia                | 0.745 |
| Latvia                 | 0.732 |
| Hong Kong              | 0.691 |
| South Korea            | 0.69  |
| Slovenia               | 0.667 |
| Belarus                | 0.65  |
| Greece                 | 0.642 |
| Serbia                 | 0.614 |
| Bulgaria               | 0.592 |
| Cambodia               | 0.59  |
| Albania                | 0.576 |
| Kazakhstan             | 0.546 |
| Japan                  | 0.449 |
| Vietnam                | 0.203 |
| Philippines            | 0.198 |
| Malta                  | 0.159 |

|                        |       |
|------------------------|-------|
| Netherlands            | 0.904 |
| Poland                 | 0.904 |
| Portugal               | 0.904 |
| Romania                | 0.904 |
| Russian Federation     | 0.904 |
| Slovakia               | 0.904 |
| Spain                  | 0.904 |
| Ukraine                | 0.904 |
| Montenegro             | 0.894 |
| Bosnia and Herzegovina | 0.886 |
| Latvia                 | 0.883 |
| China                  | 0.878 |
| Georgia                | 0.867 |
| Slovenia               | 0.778 |
| Belarus                | 0.772 |
| South Korea            | 0.765 |
| Albania                | 0.707 |
| Serbia                 | 0.705 |
| Greece                 | 0.701 |
| Bulgaria               | 0.678 |
| Hong Kong              | 0.66  |
| Kazakhstan             | 0.642 |
| Cambodia               | 0.514 |
| Vietnam                | 0.189 |
| Japan                  | 0.163 |
| Denmark                | 0.146 |
| Brazil                 | 0.143 |
| Philippines            | 0.142 |

|                        |       |
|------------------------|-------|
| Belarus                | 0.243 |
| Lithuania              | 0.239 |
| Germany                | 0.237 |
| Croatia                | 0.225 |
| Belgium                | 0.224 |
| Spain                  | 0.219 |
| Netherlands            | 0.218 |
| Romania                | 0.218 |
| Austria                | 0.217 |
| Italy                  | 0.217 |
| Georgia                | 0.217 |
| Hungary                | 0.216 |
| Slovakia               | 0.215 |
| Portugal               | 0.211 |
| Latvia                 | 0.210 |
| Luxembourg             | 0.210 |
| Montenegro             | 0.207 |
| Bosnia and Herzegovina | 0.206 |
| Kazakhstan             | 0.202 |
| Slovenia               | 0.161 |
| Bulgaria               | 0.137 |
| Greece                 | 0.132 |
| Albania                | 0.132 |
| Serbia                 | 0.131 |
| Japan                  | 0.130 |
| Vietnam                | 0.129 |
| Brazil                 | 0.089 |
| Philippines            | 0.070 |

|                    |       |
|--------------------|-------|
| Mexico             | 0.143 |
| Denmark            | 0.134 |
| Canada             | 0.13  |
| Brazil             | 0.115 |
| Chile              | 0.108 |
| Thailand           | 0.106 |
| Switzerland        | 0.1   |
| Ireland            | 0.083 |
| Syria              | 0.083 |
| Armenia            | 0.08  |
| USA                | 0.076 |
| Venezuela          | 0.074 |
| Cuba               | 0.063 |
| Cyprus             | 0.058 |
| Singapore          | 0.051 |
| Colombia           | 0.045 |
| Malaysia           | 0.044 |
| Indonesia          | 0.039 |
| Sweden             | 0.038 |
| Costa Rica         | 0.033 |
| Panama             | 0.033 |
| Argentina          | 0.031 |
| Guatemala          | 0.03  |
| Ecuador            | 0.021 |
| Peru               | 0.015 |
| Dominican Republic | 0.014 |
| Kenya              | 0.013 |
| Kyrgyzstan         | 0.013 |
| Uruguay            | 0.013 |
| India              | 0.011 |

|                |       |
|----------------|-------|
| Switzerland    | 0.135 |
| Armenia        | 0.099 |
| Cyprus         | 0.077 |
| Syria          | 0.07  |
| Chile          | 0.062 |
| United Kingdom | 0.058 |
| Thailand       | 0.053 |
| Canada         | 0.046 |
| Sweden         | 0.045 |
| Indonesia      | 0.038 |
| Argentina      | 0.035 |
| Venezuela      | 0.035 |
| Mexico         | 0.032 |
| USA            | 0.03  |
| Singapore      | 0.029 |
| Colombia       | 0.026 |
| Cuba           | 0.025 |
| Costa Rica     | 0.022 |
| Malaysia       | 0.017 |
| Tunisia        | 0.016 |
| Guatemala      | 0.015 |
| Panama         | 0.014 |
| Uruguay        | 0.013 |
| Kyrgyzstan     | 0.012 |
| Mongolia       | 0.012 |
| Kenya          | 0.011 |
| Norway         | 0.008 |
| Estonia        | 0.007 |
| Ireland        | 0.006 |
| South Africa   | 0.006 |

|                |       |
|----------------|-------|
| Chile          | 0.047 |
| Canada         | 0.042 |
| Venezuela      | 0.030 |
| USA            | 0.030 |
| Mexico         | 0.029 |
| Thailand       | 0.024 |
| Cuba           | 0.020 |
| United Kingdom | 0.016 |
| Denmark        | 0.010 |
| Singapore      | 0.009 |
| Argentina      | 0.008 |
| Guatemala      | 0.008 |
| Colombia       | 0.007 |
| Costa Rica     | 0.007 |
| Panama         | 0.006 |
| Switzerland    | 0.005 |
| Malaysia       | 0.004 |
| Indonesia      | 0.003 |
| Armenia        | 0.003 |
| Syria          | 0.002 |
| Ecuador        | 0.001 |
| Cyprus         | 0.001 |



|                      |       |
|----------------------|-------|
| Mongolia             | 0.009 |
| Paraguay             | 0.008 |
| Turkey               | 0.008 |
| South Africa         | 0.007 |
| Tunisia              | 0.007 |
| Norway               | 0.006 |
| Seychelles           | 0.006 |
| Lebanon              | 0.005 |
| Estonia              | 0.004 |
| Netherlands Antilles | 0.004 |
| Nigeria              | 0.004 |
| El Salvador          | 0.003 |
| Honduras             | 0.003 |
| Jamaica              | 0.003 |
| Saint Lucia          | 0.002 |
| Antigua and Barbuda  | 0.001 |
| Australia            | 0.001 |
| Cote d Ivoire        | 0.001 |
| Gabon                | 0.001 |
| Guyana               | 0.001 |
| Mozambique           | 0.001 |
| Senegal              | 0.001 |
| Suriname             | 0.001 |

|                      |       |
|----------------------|-------|
| Ecuador              | 0.005 |
| Gabon                | 0.005 |
| Turkey               | 0.005 |
| Dominican Republic   | 0.004 |
| Paraguay             | 0.004 |
| India                | 0.003 |
| Mozambique           | 0.003 |
| Australia            | 0.002 |
| Cote d Ivoire        | 0.002 |
| Malta                | 0.002 |
| Netherlands Antilles | 0.002 |
| Peru                 | 0.002 |
| Bahamas              | 0.001 |
| Belize               | 0.001 |
| Honduras             | 0.001 |
| Lebanon              | 0.001 |
| Seychelles           | 0.001 |
| Suriname             | 0.001 |

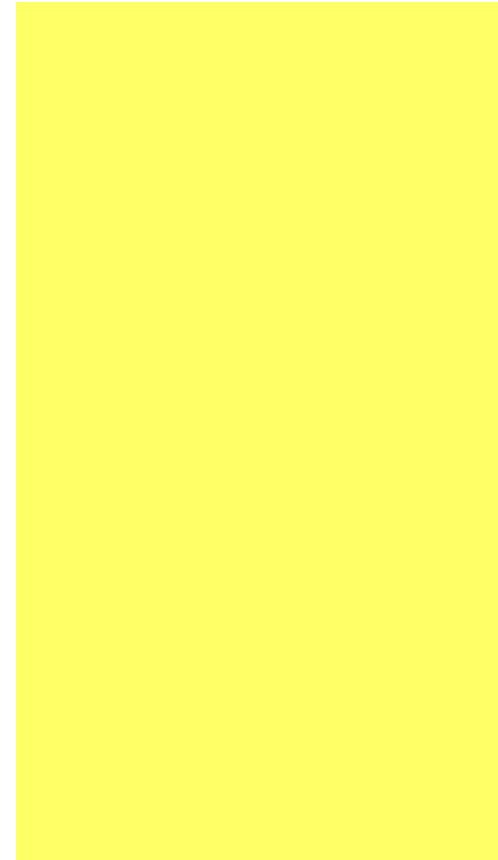

**Supplementary Table 6. Data sets used in this study.** The 22 segment- and lineage-specific data sets of swine influenza A viruses collected globally that were used in the spatial analysis. For each data set, the number of sequences and the countries for which sequence data were available are listed (Arg = Argentina; Can = Canada; Chi = China; Eur = European countries; Kor = South Korea; Jap = Japan; Mex = Mexico; Thai = Thailand; USA = United States; Viet = Vietnam).

| Segment    |               | Classical                       | TRIG                        | Eurasian        | Human seasonal      |
|------------|---------------|---------------------------------|-----------------------------|-----------------|---------------------|
| <b>PB2</b> | No. sequences | 213                             | 340                         | 192             |                     |
|            | Countries     | Can Chi Eur Jap<br>USA          | Can Chi Kor Mex<br>USA Viet | Chi Eur<br>Thai |                     |
| <b>PB1</b> | No. sequences | 211                             | 344                         | 190             |                     |
|            | Countries     | Can Chi Eur Jap<br>USA          | Can Chi Kor Mex<br>USA Viet | Chi Eur<br>Thai |                     |
| <b>PA</b>  | No. sequences | 213                             | 329                         | 190             |                     |
|            | Countries     | Can Chi Eur Jap<br>USA          | Can Chi Kor USA<br>Viet     | Chi Eur<br>Thai |                     |
| <b>H1</b>  | No. sequences | 321                             |                             | 140             | 192                 |
|            | Countries     | Can Chi Eur Jap<br>Kor Thai USA |                             | Chi Eur Kor     | Arg Eur<br>USA Viet |
| <b>H3</b>  | No. sequences |                                 |                             |                 | 459                 |

|           |               |                                       |                                                       |
|-----------|---------------|---------------------------------------|-------------------------------------------------------|
|           | Countries     |                                       | Arg Can<br>Chi Eur<br>Kor Mex<br>Thai USA<br>Viet     |
| <b>NP</b> | No. sequences | 549                                   | 186                                                   |
|           | Countries     | Can Chi Eur Jap Kor Mex Thai USA Viet | Chi Eur<br>Thai                                       |
| <b>N1</b> | No. sequences | 286                                   | 150                                                   |
|           | Countries     | Can Chi Eur Jap<br>USA                | Chi Eur<br>Thai                                       |
| <b>N2</b> | No. sequences |                                       | 675                                                   |
|           | Countries     |                                       | Arg Can<br>Chi Eur<br>Jap Kor<br>Mex Thai<br>USA Viet |
| <b>MP</b> | No. sequences | 495                                   | 199                                                   |
|           | Countries     | Can Chi Eur Jap Kor Mex USA Viet      | Chi Eur<br>Thai                                       |
| <b>NS</b> | No. sequences | 583                                   | 163                                                   |
|           | Countries     | Can,Chi,Eur,Jap,Kor,Mex,Thai,USA,Viet | Chi, Eur,<br>Thai                                     |

**Supplementary Table 7. Pig population sizes by country.** Data for the year 2010 is provided. Data from previous years (1969-2009) is available at <http://data.fao.org/datasets>.

| <b>Country</b>                   | <b>Pig population in 2010</b> |
|----------------------------------|-------------------------------|
| Albania                          | 164,000                       |
| Algeria                          | 5,500                         |
| American Samoa                   | 10,500                        |
| Angola                           | 1,934,764                     |
| Antigua and Barbuda              | 3,000                         |
| Argentina                        | 2,300,000                     |
| Armenia                          | 112,608                       |
| Australia                        | 2,289,292                     |
| Austria                          | 3,136,967                     |
| Azerbaijan                       | 5,347                         |
| Bahamas                          | 5,000                         |
| Barbados                         | 21,500                        |
| Belarus                          | 3,781,500                     |
| Belgium                          | 6,430,000                     |
| Belize                           | 17,400                        |
| Benin                            | 368,000                       |
| Bermuda                          | 800                           |
| Bhutan                           | 19,711                        |
| Bolivia (Plurinational State of) | 2,640,616                     |
| Bosnia and Herzegovina           | 590,431                       |
| Botswana                         | 12,950                        |
| Brazil                           | 39,000,000                    |
| British Virgin Islands           | 1,500                         |
| Brunei Darussalam                | 1,300                         |
| Bulgaria                         | 729,798                       |

|                                       |             |
|---------------------------------------|-------------|
| Burkina Faso                          | 2,167,245   |
| Burundi                               | 244,362     |
| Cabo Verde                            | 238,600     |
| Cambodia                              | 2,057,431   |
| Cameroon                              | 2,150,000   |
| Canada                                | 12,700,000  |
| Cayman Islands                        | 1,063       |
| Central African Republic              | 1,087,000   |
| Chad                                  | 30,400      |
| Chile                                 | 2,706,148   |
| China                                 | 476,000,000 |
| China, Hong Kong SAR                  | 170,000     |
| China, Taiwan Province of             | 6,130,003   |
| China, mainland                       | 470,000,000 |
| Colombia                              | 5,161,804   |
| Congo                                 | 88,000      |
| Cook Islands                          | 32,200      |
| Costa Rica                            | 438,000     |
| Croatia                               | 1,231,000   |
| Cuba                                  | 1,591,000   |
| Cyprus                                | 463,729     |
| Czech Republic                        | 1,909,000   |
| Côte d'Ivoire                         | 348,590     |
| Democratic People's Republic of Korea | 2,248,000   |
| Democratic Republic of the Congo      | 977,379     |
| Denmark                               | 13,200,000  |
| Dominica                              | 5,000       |
| Dominican Republic                    | 620,000     |

|                             |            |
|-----------------------------|------------|
| Ecuador                     | 1,489,761  |
| Egypt                       | 10,500     |
| El Salvador                 | 427,000    |
| Equatorial Guinea           | 6,400      |
| Estonia                     | 365,100    |
| Ethiopia                    | 31,000     |
| Falkland Islands (Malvinas) | 40         |
| Fiji                        | 145,700    |
| Finland                     | 1,366,932  |
| France                      | 14,300,000 |
| French Guiana               | 9,900      |
| French Polynesia            | 30,000     |
| Gabon                       | 215,000    |
| Gambia                      | 28,500     |
| Georgia                     | 135,200    |
| Germany                     | 26,500,000 |
| Ghana                       | 536,000    |
| Greece                      | 1,087,000  |
| Grenada                     | 3,000      |
| Guadeloupe                  | 16,319     |
| Guam                        | 5,200      |
| Guatemala                   | 2,733,280  |
| Guinea                      | 95,187     |
| Guinea-Bissau               | 394,147    |
| Guyana                      | 13,600     |
| Haiti                       | 1,001,000  |
| Honduras                    | 469,635    |
| Hungary                     | 3,247,000  |

|                                  |            |
|----------------------------------|------------|
| Iceland                          | 40,016     |
| India                            | 9,630,000  |
| Indonesia                        | 7,477,000  |
| Ireland                          | 1,516,300  |
| Israel                           | 223,000    |
| Italy                            | 9,157,100  |
| Jamaica                          | 197,400    |
| Japan                            | 9,800,000  |
| Kazakhstan                       | 1,326,300  |
| Kenya                            | 347,413    |
| Kiribati                         | 13,000     |
| Kyrgyzstan                       | 59,791     |
| Lao People's Democratic Republic | 2,752,000  |
| Latvia                           | 376,500    |
| Lebanon                          | 7,735      |
| Lesotho                          | 83,976     |
| Liberia                          | 265,300    |
| Liechtenstein                    | 1,690      |
| Lithuania                        | 928,200    |
| Luxembourg                       | 83,774     |
| Madagascar                       | 1,380,250  |
| Malawi                           | 1,861,503  |
| Malaysia                         | 1,922,321  |
| Mali                             | 75,089     |
| Malta                            | 70,583     |
| Martinique                       | 11,193     |
| Mauritius                        | 22,327     |
| Mexico                           | 15,400,000 |

|                                  |            |
|----------------------------------|------------|
| Micronesia (Federated States of) | 33,000     |
| Mongolia                         | 24,842     |
| Montenegro                       | 11,205     |
| Montserrat                       | 1,200      |
| Morocco                          | 8,500      |
| Mozambique                       | 1,340,712  |
| Myanmar                          | 9,416,208  |
| Namibia                          | 65,000     |
| Nauru                            | 3,000      |
| Nepal                            | 1,064,858  |
| Netherlands                      | 12,300,000 |
| Netherlands Antilles             | 2,710      |
| New Caledonia                    | 37,000     |
| New Zealand                      | 335,114    |
| Nicaragua                        | 480,000    |
| Niger                            | 40,000     |
| Nigeria                          | 7,471,730  |
| Niue                             | 2,100      |
| Norway                           | 850,383    |
| Panama                           | 276,400    |
| Papua New Guinea                 | 1,950,000  |
| Paraguay                         | 1,181,930  |
| Peru                             | 3,254,413  |
| Philippines                      | 13,400,000 |
| Poland                           | 14,900,000 |
| Portugal                         | 1,917,000  |
| Puerto Rico                      | 50,000     |
| Republic of Korea                | 9,880,632  |



|                                  |            |
|----------------------------------|------------|
| Republic of Moldova              | 377,142    |
| Romania                          | 5,793,400  |
| Russian Federation               | 17,200,000 |
| Rwanda                           | 684,708    |
| Saint Kitts and Nevis            | 6,000      |
| Saint Lucia                      | 20,000     |
| Saint Vincent and the Grenadines | 8,000      |
| Samoa                            | 203,000    |
| Sao Tome and Principe            | 2,850      |
| Senegal                          | 354,474    |
| Serbia                           | 3,488,738  |
| Seychelles                       | 4,470      |
| Sierra Leone                     | 47,364     |
| Singapore                        | 270,000    |
| Slovakia                         | 740,862    |
| Slovenia                         | 415,230    |
| Solomon Islands                  | 54,000     |
| Somalia                          | 4,000      |
| South Africa                     | 1,594,494  |
| Spain                            | 25,700,000 |
| Sri Lanka                        | 83,790     |
| Suriname                         | 32,125     |
| Swaziland                        | 32,000     |
| Sweden                           | 1,519,900  |
| Switzerland                      | 1,588,998  |
| Syrian Arab Republic             | 0          |
| Tajikistan                       | 418        |
| Thailand                         | 7,623,730  |

|                                    |            |
|------------------------------------|------------|
| Macedonia                          | 190,552    |
| Timor-Leste                        | 415,315    |
| Togo                               | 564,900    |
| Tokelau (Associate Member)         | 1,000      |
| Tonga                              | 81,200     |
| Trinidad and Tobago                | 34,799     |
| Tunisia                            | 5,800      |
| Turkey                             | 1,896      |
| Turkmenistan                       | 30,000     |
| Tuvalu                             | 13,600     |
| Uganda                             | 2,297,000  |
| Ukraine                            | 7,576,600  |
| United Kingdom                     | 4,460,000  |
| United Republic of Tanzania        | 495,000    |
| United States Virgin Islands       | 2,650      |
| United States of America           | 64,900,000 |
| Uruguay                            | 210,000    |
| Uzbekistan                         | 92,000     |
| Vanuatu                            | 90,000     |
| Venezuela (Bolivarian Republic of) | 3,385,000  |
| Viet Nam                           | 27,400,000 |
| Wallis and Futuna Islands          | 25,000     |
| Zambia                             | 715,000    |
| Zimbabwe                           | 635,000    |
